# Supplementary material for: Machine learning reaction barriers in low data regimes: a horizontal and diagonal transfer learning approach
Source: Royal Society of Chemistry journal article supplement (doi:10.1039/d3dd00085k), 2023-01-01
Supplement: d3dd00085k1.pdf [file d3dd00085k1.pdf]

# Machine learning reaction barriers in low data regimes: A horizontal and diagonal transfer learning approach

## Supporting Information

Samuel G. Espley,<sup>a</sup> Elliot H. E. Farrar,<sup>a</sup> David Buttar,<sup>b</sup> Simone Tomasi,<sup>c</sup> and Matthew N. Grayson\*<sup>a</sup>

- Department of Chemistry, University of Bath, Claverton Down, Bath, BA2 7AY, UK.
- Data Science and Modelling, Pharmaceutical Sciences, R&D, AstraZeneca, Macclesfield, UK.
- Chemical Development, Pharmaceutical Technology & Development, Operations, AstraZeneca, Macclesfield, UK.

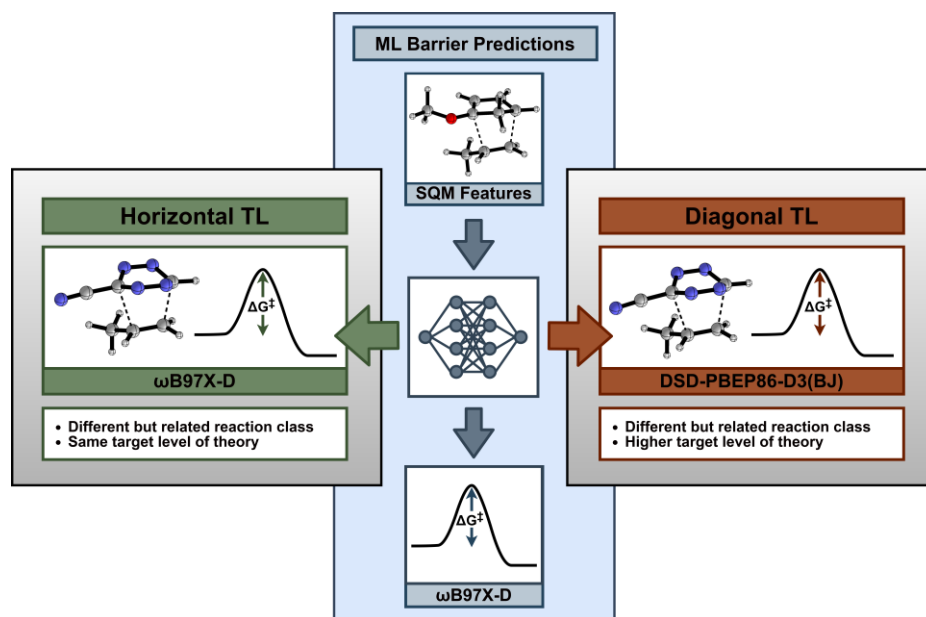

## Table of Contents

|                                                      |    |
|------------------------------------------------------|----|
| 1. Dataset Generation.....                           | 2  |
| 2. Feature Extraction.....                           | 4  |
| 3. Machine Learning.....                             | 10 |
| 4. Machine Learning Hyperparameters and Metrics..... | 13 |
| 5. NN Feature Importances.....                       | 19 |
| 6. TL Datasets.....                                  | 20 |
| 7. hTL Metrics.....                                  | 22 |
| 8. dTL Metrics.....                                  | 28 |
| 9. Dataset Plots.....                                | 30 |
| 10. Learning Curves.....                             | 32 |
| 11. Transition State Structural Analysis.....        | 41 |
| 12. Direct Training.....                             | 45 |
| 13. References.....                                  | 49 |

# 1. Dataset Generation

Preliminary geometries were constructed for 1355 endo/exo and 414 tetrazine/alkyne transition states by altering chosen Diels-Alder backbones based on literature examples with a variety of functional groups.<sup>1-13</sup> These structures were generated using the Custom R-Group Enumeration in Schrödinger's MacroModel (version 12.7).<sup>14</sup>

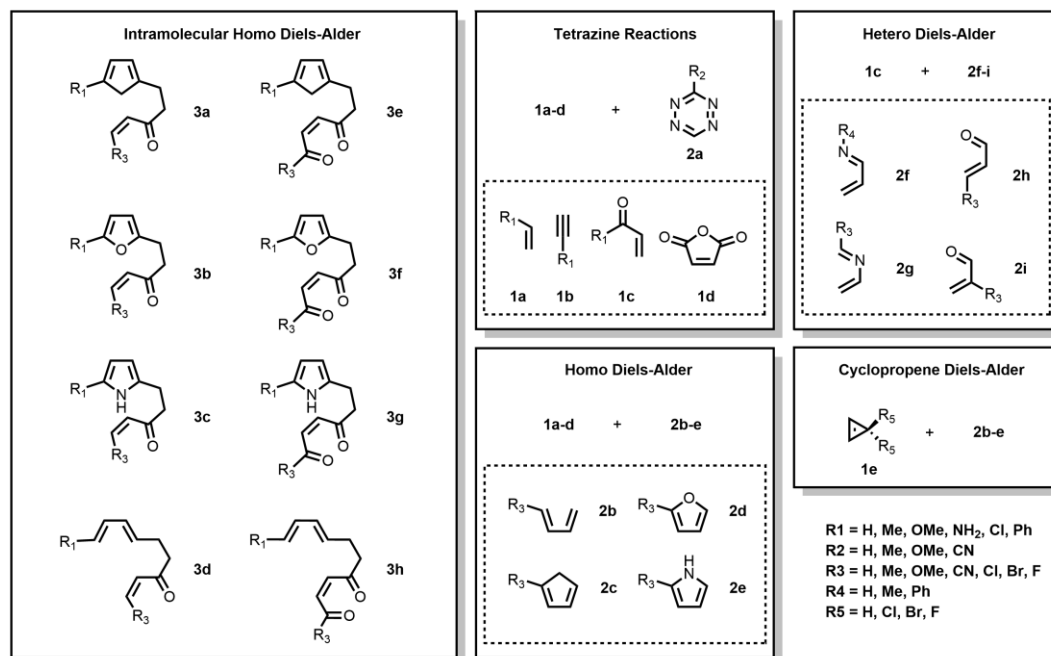

Fig. S1 - Overview of the enumerations made to create the Diels-Alder dataset.

These enumerated reactant and transition state structures (Fig. S1) were then conformationally searched using Schrödinger's MacroModel (version 12.7)<sup>14,15</sup> with the OPLS3e forcefield.<sup>16</sup> The lowest energy OPLS3e conformers for all reactant and transition state structures were then optimised with AM1<sup>17</sup>, PM3<sup>18</sup>, and  $\omega$ B97X-D/def2-TZVP<sup>19,20</sup> using Gaussian 16 (Revision A.03 and C.01).<sup>21,22</sup> All tetrazine Diels-Alder reactions were also optimised with DSD-PBEP86-D3(BJ)/def2-TZVP<sup>23</sup> for diagonal transfer learning. All reactant structures optimised to minima whilst the number of optimised concerted transition state structures for each level of theory (dataset size) ranged from 1065 – 1141 structures (Table S1). Free energy reaction barriers were calculated from temperature (298.15 K) and concentration corrected (1 mol l<sup>-1</sup>) quasi-harmonic free energies obtained with GoodVibes (Table S1).<sup>24</sup>

| Dataset |      | Barrier Range / kcal mol <sup>-1</sup> | Dataset Size (with DFT) |
|---------|------|----------------------------------------|-------------------------|
| AM1     | Endo | 30.22 - 59.75                          | 1065                    |
|         | Exo  | 28.13 - 53.07                          | 1109                    |
| PM3     | Endo | 32.3 - 56.33                           | 1141                    |
|         | Exo  | 31.6 - 55.99                           | 1141                    |
| DFT     | Endo | 12.76 - 54.53                          | -                       |
|         | Exo  | 9.4 - 50.45                            | -                       |

Table S1 - Transition state barrier ranges and dataset sizes for all levels of theory when combined with DFT calculations. Dataset size is for the combined X-DFT dataset where X is either AM1 or PM3.

The baseline methods of AM1 and PM3 were chosen based on their prevalence and usage within the literature to investigate the Diels-Alder reaction.<sup>25–28</sup> The newer methods of PM6<sup>29</sup> and PM7<sup>30</sup> were also investigated however both exhibited issues in reaching convergence for concerted Diels-Alder reactions. For the target level of theory, the  $\omega$ B97X-D<sup>19</sup> functional was chosen alongside the polarised triple- $\zeta$  valence quality (def2-TZVP) basis set<sup>20</sup> based on their performance in barrier height calculations<sup>31,32</sup> and previous work within this area utilising this combination.<sup>33</sup>

To ensure a consistent dataset of Diels-Alder transition states, only those close to a concerted mechanism were used. All transition state structures with a difference between the C1–C2 and C3–C4 bond forming distances (Fig. S2) of greater than 0.6 Å at the AM1 and PM3 levels of theory were removed; distance value calculated by equation (1).

$$(1) \quad \Delta Distance = |Distance_{C1-C2} - Distance_{C3-C4}|$$

All Gaussian 16 computed output files are publicly available in *Dataset for “Machine learning reaction barriers in low data regimes: A horizontal and diagonal transfer learning approach”* in the University of Bath Research Data Archive (accessible at: <https://doi.org/10.15125/BATH-01229>). All structures visualised within this work were created using CYLView.<sup>34</sup>

## 2. Feature Extraction

A number of physical organic chemical features were extracted for each Diels-Alder dataset at the AM1 and PM3 levels of theory utilising a select group of python packages (Table S2-3). Features were extracted for the core atoms in both the diene and dienophile reactant structures as well as for the associated transition state structure. Fig. S2 provides an example of an enumeration and of the common atoms (highlighted) that features were extracted for. With all models, the feature processing was consistently performed solely on the training sets before applying the same transformation to the test sets to prevent data leakage. All train-test splits were performed using the same random state (23), that was chosen at random, to ensure uniformity across splits.

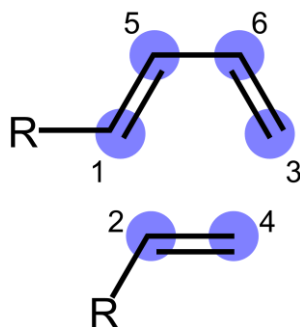

Fig. S2 - General Diels-Alder Reaction and atom numbering. Features were extracted for core atoms (highlighted blue).

| Feature                        | Description                                                                                     | Source                  |
|--------------------------------|-------------------------------------------------------------------------------------------------|-------------------------|
| atomcharges_apt_01_ts          | APT Atomic charge for the transition state structure for each atom n (range 01-06).             | CCLIB <sup>35</sup>     |
| atomcharges_apt_sum_01_ts      | APT Summed atomic charge for the transition state structure for each atom n (range 01-06).      | CCLIB <sup>35</sup>     |
| atomcharges_mulliken_01_ts     | Mulliken atomic charge for the transition state structure for each atom n (range 01-06).        | CCLIB <sup>35</sup>     |
| atomcharges_mulliken_sum_01_ts | Mulliken summed atomic charge for the transition state structure for each atom n (range 01-06). | CCLIB <sup>35</sup>     |
| homoenergies_ts                | Highest occupied molecular orbital (HOMO) energy - transition state.                            | CCLIB <sup>35</sup>     |
| lumoenergies_ts                | Lowest unoccupied molecular orbital (LUMO) energy - transition state.                           | CCLIB <sup>35</sup>     |
| hardness_ts                    | Global hardness - transition state.                                                             | HSAB <sup>36</sup>      |
| softness_ts                    | Global softness - transition state.                                                             | HSAB <sup>36</sup>      |
| chemicalpotential_ts           | Global chemical potential - transition state.                                                   | HSAB <sup>36</sup>      |
| electrophilicity_ts            | Global electrophilicity - transition state.                                                     | HSAB <sup>36</sup>      |
| gv_E_ts                        | Electronic energy.                                                                              | GoodVibes <sup>24</sup> |
| gv_ZPE_ts                      | Zero-point energy.                                                                              | GoodVibes <sup>24</sup> |
| gv_H_ts                        | Enthalpy.                                                                                       | GoodVibes <sup>24</sup> |
| gv_T.S_ts                      | Entropy.                                                                                        | GoodVibes <sup>24</sup> |
| gv_T.qh-S_ts                   | Quasi-harmonic entropy.                                                                         | GoodVibes <sup>24</sup> |
| gv_G(T)_ts                     | Gibbs free energy.                                                                              | GoodVibes <sup>24</sup> |
| gv_qh-G(T)_ts                  | Quasi-harmonic Gibbs free energy.                                                               | GoodVibes <sup>24</sup> |
| ea_ts                          | Semi-Empirical Quasi-harmonic free energy reaction barrier.                                     | GoodVibes <sup>24</sup> |

|                                       |                                                                                                  |                        |
|---------------------------------------|--------------------------------------------------------------------------------------------------|------------------------|
| <b>sasa_1_ts</b>                      | Solvent accessible surface area for each atom n (range 1-6) - transition state.                  | Freesasa <sup>37</sup> |
| <b>sasa_R1_ts</b>                     | Solvent accessible surface area for R1 atom - transition state.                                  | Freesasa <sup>37</sup> |
| <b>sasa_total_ts</b>                  | Total Solvent accessible surface area for core atoms - transition state.                         | Freesasa <sup>37</sup> |
| <b>sterimol_R1_L_ts</b>               | Sterimol L parameter for R1 substituent - transition state.                                      | DBStep <sup>38</sup>   |
| <b>sterimol_R1_Bmin_ts</b>            | Sterimol B <sub>min</sub> parameter for R1 substituent - transition state.                       | DBStep <sup>38</sup>   |
| <b>sterimol_R1_Bmax_ts</b>            | Sterimol B <sub>max</sub> parameter for R1 substituent - transition state.                       | DBStep <sup>38</sup>   |
| <b>PBV_1_ts</b>                       | Percent buried volume (3.5 Å) for each reacting atom n (range 1-4) - transition state.           | DBStep <sup>38</sup>   |
| <b>HBA2_ts</b>                        | Number of hydrogen bond acceptors - transition state.                                            | Pybel <sup>39</sup>    |
| <b>HBD_ts</b>                         | Number of hydrogen bond donors - transition state.                                               | Pybel <sup>39</sup>    |
| <b>nF_ts</b>                          | Number of Fluorine atoms - transition state.                                                     | Pybel <sup>39</sup>    |
| <b>bond_forming_distance_1_ts</b>     | Transition state bond forming distance between atoms 1 and 2.                                    | -                      |
| <b>bond_forming_distance_2_ts</b>     | Transition state bond forming distance between atoms 3 and 4.                                    | -                      |
| <b>bond_forming_angle_1_ts</b>        | Transition state bond forming angle between atoms 2, 1, and 3.                                   | -                      |
| <b>bond_forming_angle_2_ts</b>        | Transition state bond forming angle between atoms 4, 3, and 1.                                   | -                      |
| <b>bond_form_diff_ts</b>              | Transition state difference between the two bond forming distances.                              | -                      |
| <b>bond_ang_diff_ts</b>               | Transition state difference between the two bond forming angles.                                 | -                      |
| <b>atomcharges_apt_01_di</b>          | APT Atomic charge for the diene reactant structure for each atom n (01, 03, 05, 06).             | CCLIB <sup>35</sup>    |
| <b>atomcharges_apt_sum_01_di</b>      | APT Summed atomic charge for the diene reactant structure for each atom n (01, 03, 05, 06).      | CCLIB <sup>35</sup>    |
| <b>atomcharges_mulliken_01_di</b>     | Mulliken atomic charge for the diene reactant structure for each atom n (01, 03, 05, 06).        | CCLIB <sup>35</sup>    |
| <b>atomcharges_mulliken_sum_01_di</b> | Mulliken summed atomic charge for the diene reactant structure for each atom n (01, 03, 05, 06). | CCLIB <sup>35</sup>    |
| <b>homoenergies_di</b>                | HOMO energy - diene reactant.                                                                    | CCLIB <sup>35</sup>    |
| <b>lumoenergies_di</b>                | LUMO energy - diene reactant.                                                                    | CCLIB <sup>35</sup>    |
| <b>vibfreqs_01_di</b>                 | Lowest vibrational frequency for the diene reactant.                                             | CCLIB <sup>35</sup>    |
| <b>vibirs_01_di</b>                   | Lowest infrared intensity for the diene reactant.                                                | CCLIB <sup>35</sup>    |
| <b>hardness_di</b>                    | Global hardness - diene reactant.                                                                | HSAB <sup>36</sup>     |
| <b>softness_di</b>                    | Global softness - diene reactant.                                                                | HSAB <sup>36</sup>     |
| <b>chemicalpotential_di</b>           | Global chemical potential - diene reactant.                                                      | HSAB <sup>36</sup>     |
| <b>electrophilicity_di</b>            | Global electrophilicity - diene reactant.                                                        | HSAB <sup>36</sup>     |
| <b>sasa_1_di</b>                      | Solvent accessible surface area for each atom n (1, 3, 5, 6) - diene reactant.                   | Freesasa <sup>37</sup> |
| <b>sasa_R1_di</b>                     | Solvent accessible surface area for R1 atom - diene reactant.                                    | Freesasa <sup>37</sup> |
| <b>sasa_total_di</b>                  | Total solvent accessible surface area for core atoms - diene reactant.                           | Freesasa <sup>37</sup> |

|                                       |                                                                                               |                        |
|---------------------------------------|-----------------------------------------------------------------------------------------------|------------------------|
| <b>sterimol_R1_L_di</b>               | Sterimol L parameter for R1 substituent - diene reactant.                                     | DBStep <sup>38</sup>   |
| <b>sterimol_R1_Bmin_di</b>            | Sterimol B <sub>min</sub> parameter for R1 substituent - diene reactant.                      | DBStep <sup>38</sup>   |
| <b>sterimol_R1_Bmax_di</b>            | Sterimol B <sub>max</sub> parameter for R1 substituent - diene reactant.                      | DBStep <sup>38</sup>   |
| <b>PBV_1_di</b>                       | Percent buried volume (3.5 Å) for each reacting atom n (1, 3) - diene reactant.               | DBStep <sup>38</sup>   |
| <b>HBA2_di</b>                        | Number of hydrogen bond acceptors - diene reactant.                                           | Pybel <sup>39</sup>    |
| <b>HBD_di</b>                         | Number of hydrogen bond donors - diene reactant.                                              | Pybel <sup>39</sup>    |
| <b>nF_di</b>                          | Number of Fluorine atoms - diene reactant.                                                    | Pybel <sup>39</sup>    |
| <b>atomcharges_apt_02_dp</b>          | APT atomic charge for the dienophile reactant structure for each atom n (02, 04).             | CCLIB <sup>35</sup>    |
| <b>atomcharges_apt_sum_02_dp</b>      | APT Summed Atomic charge for the dienophile reactant structure for each atom n (02, 04).      | CCLIB <sup>35</sup>    |
| <b>atomcharges_mulliken_02_dp</b>     | Mulliken Atomic charge for the dienophile reactant structure for each atom n (02, 04).        | CCLIB <sup>35</sup>    |
| <b>atomcharges_mulliken_sum_02_dp</b> | Mulliken Summed Atomic charge for the dienophile reactant structure for each atom n (02, 04). | CCLIB <sup>35</sup>    |
| <b>homoenergies_dp</b>                | HOMO energy - dienophile reactant.                                                            | CCLIB <sup>35</sup>    |
| <b>lumoenergies_dp</b>                | LUMO energy - dienophile reactant.                                                            | CCLIB <sup>35</sup>    |
| <b>hardness_dp</b>                    | Global hardness - dienophile reactant.                                                        | HSAB <sup>36</sup>     |
| <b>softness_dp</b>                    | Global softness - dienophile reactant.                                                        | HSAB <sup>36</sup>     |
| <b>chemicalpotential_dp</b>           | Global chemical potential - dienophile reactant.                                              | HSAB <sup>36</sup>     |
| <b>electrophilicity_dp</b>            | Global electrophilicity - dienophile reactant.                                                | HSAB <sup>36</sup>     |
| <b>sasa_2_dp</b>                      | Solvent accessible surface area for each atom n (2, 4) - dienophile reactant.                 | Freesasa <sup>37</sup> |
| <b>sasa_R1_dp</b>                     | Solvent accessible surface area for R1 atom - dienophile reactant.                            | Freesasa <sup>37</sup> |
| <b>sasa_total_dp</b>                  | Total solvent accessible surface area for core atoms - dienophile reactant.                   | Freesasa <sup>37</sup> |
| <b>sterimol_R1_L_dp</b>               | Sterimol L parameter for R1 substituent - dienophile reactant.                                | DBStep <sup>38</sup>   |
| <b>sterimol_R1_Bmin_dp</b>            | Sterimol B <sub>min</sub> parameter for R1 substituent - dienophile reactant.                 | DBStep <sup>38</sup>   |
| <b>sterimol_R1_Bmax_dp</b>            | Sterimol B <sub>max</sub> parameter for R1 substituent - dienophile reactant.                 | DBStep <sup>38</sup>   |
| <b>PBV_2_dp</b>                       | Percent buried volume (3.5 Å) for each reacting atom n (2, 4) - dienophile reactant.          | DBStep <sup>38</sup>   |
| <b>HBA2_dp</b>                        | Number of hydrogen bond acceptors - dienophile reactant.                                      | Pybel <sup>39</sup>    |
| <b>HBD_dp</b>                         | Number of hydrogen bond donors - dienophile reactant.                                         | Pybel <sup>39</sup>    |
| <b>nF_dp</b>                          | Number of Fluorine atoms - dienophile reactant.                                               | Pybel <sup>39</sup>    |

Table S2 - AM1 extracted features with brief description and source of given feature. Information on the origin of the feature is also included (e.g., reactant or transition state species).

| Feature                       | Description                                                                                     | Source                  |
|-------------------------------|-------------------------------------------------------------------------------------------------|-------------------------|
| atomcharges_apt_n_ts          | APT atomic charge for the transition state structure for each atom n (range 01-06).             | CCLIB <sup>35</sup>     |
| atomcharges_apt_sum_n_ts      | APT summed atomic charge for the transition state structure for each atom n (range 01-06).      | CCLIB <sup>35</sup>     |
| atomcharges_mulliken_n_ts     | Mulliken atomic charge for the transition state structure for each atom n (range 01-06).        | CCLIB <sup>35</sup>     |
| atomcharges_mulliken_sum_n_ts | Mulliken summed atomic charge for the transition state structure for each atom n (range 01-06). | CCLIB <sup>35</sup>     |
| homoenergies_ts               | HOMO energy - transition state.                                                                 | CCLIB <sup>35</sup>     |
| lumoenergies_ts               | LUMO energy - transition state.                                                                 | CCLIB <sup>35</sup>     |
| hardness_ts                   | Global hardness - transition state.                                                             | HSAB <sup>36</sup>      |
| softness_ts                   | Global softness - transition state.                                                             | HSAB <sup>36</sup>      |
| chemicalpotential_ts          | Global chemical potential - transition state.                                                   | HSAB <sup>36</sup>      |
| electrophilicity_ts           | Global electrophilicity - transition state.                                                     | HSAB <sup>36</sup>      |
| gv_E_ts                       | Electronic energy.                                                                              | GoodVibes <sup>24</sup> |
| gv_ZPE_ts                     | Zero-point energy.                                                                              | GoodVibes <sup>24</sup> |
| gv_H_ts                       | Enthalpy.                                                                                       | GoodVibes <sup>24</sup> |
| gv_T.S_ts                     | Entropy.                                                                                        | GoodVibes <sup>24</sup> |
| gv_T.qh-S_ts                  | Quasi-harmonic entropy.                                                                         | GoodVibes <sup>24</sup> |
| gv_G(T)_ts                    | Gibbs free energy.                                                                              | GoodVibes <sup>24</sup> |
| gv_qh-G(T)_ts                 | Quasi-harmonic Gibbs free energy.                                                               | GoodVibes <sup>24</sup> |
| ea_ts                         | Semi-Empirical Quasi-harmonic free energy reaction barrier.                                     | GoodVibes <sup>24</sup> |
| sasa_n_ts                     | Solvent accessible surface area for each atom n (range 1-6) - transition state.                 | Freesasa <sup>37</sup>  |
| sasa_R1_ts                    | Solvent accessible surface area for R1 atom - transition state.                                 | Freesasa <sup>37</sup>  |
| sasa_total_ts                 | Total solvent accessible surface area for core atoms - transition state.                        | Freesasa <sup>37</sup>  |
| sterimol_R1_L_ts              | Sterimol L parameter for R1 substituent - transition state.                                     | DBStep <sup>38</sup>    |
| sterimol_R1_Bmin_ts           | Sterimol B <sub>min</sub> parameter for R1 substituent - transition state.                      | DBStep <sup>38</sup>    |
| sterimol_R1_Bmax_ts           | Sterimol B <sub>max</sub> parameter for R1 substituent - transition state.                      | DBStep <sup>38</sup>    |
| PBV_n_ts                      | Percent buried volume (3.5 Å) for each reacting atom n (range 1-4) - transition state.          | DBStep <sup>38</sup>    |
| HBA2_ts                       | Number of hydrogen bond acceptors - transition state.                                           | Pybel <sup>39</sup>     |
| HBD_ts                        | Number of hydrogen bond donors - transition state.                                              | Pybel <sup>39</sup>     |
| nF_ts                         | Number of Fluorine atoms - transition state.                                                    | Pybel <sup>39</sup>     |
| bond_forming_distance_1_ts    | Transition state bond forming distance between atoms 1 and 2.                                   | -                       |
| bond_forming_distance_2_ts    | Transition state bond forming distance between atoms 3 and 4.                                   | -                       |
| bond_forming_angle_1_ts       | Transition state bond forming angle between atoms 2, 1, and 3.                                  | -                       |
| bond_forming_angle_2_ts       | Transition state bond forming angle between atoms 4, 3, and 1.                                  | -                       |
| bond_form_diff_ts             | Transition state difference between the two bond forming distances.                             | -                       |

|                                      |                                                                                                  |                        |
|--------------------------------------|--------------------------------------------------------------------------------------------------|------------------------|
| <b>bond_ang_diff_ts</b>              | Transition state difference between the two bond forming angles.                                 | -                      |
| <b>atomcharges_apt_n_di</b>          | APT atomic charge for the diene reactant structure for each atom n (01, 03, 05, 06).             | CCLIB <sup>35</sup>    |
| <b>atomcharges_apt_sum_n_di</b>      | APT summed atomic charge for the diene reactant structure for each atom n (01, 03, 05, 06).      | CCLIB <sup>35</sup>    |
| <b>atomcharges_mulliken_n_di</b>     | Mulliken atomic charge for the diene reactant structure for each atom n (01, 03, 05, 06).        | CCLIB <sup>35</sup>    |
| <b>atomcharges_mulliken_sum_n_di</b> | Mulliken summed atomic charge for the diene reactant structure for each atom n (01, 03, 05, 06). | CCLIB <sup>35</sup>    |
| <b>homoenergies_di</b>               | HOMO energy - diene reactant.                                                                    | CCLIB <sup>35</sup>    |
| <b>lumoenergies_di</b>               | LUMO energy - diene reactant.                                                                    | CCLIB <sup>35</sup>    |
| <b>vibfreqs_01_di</b>                | Lowest vibrational frequency for the diene reactant.                                             | CCLIB <sup>35</sup>    |
| <b>vibirs_01_di</b>                  | Lowest infrared intensity for the diene reactant.                                                | CCLIB <sup>35</sup>    |
| <b>hardness_di</b>                   | Global hardness - diene reactant.                                                                | HSAB <sup>36</sup>     |
| <b>softness_di</b>                   | Global softness - diene reactant.                                                                | HSAB <sup>36</sup>     |
| <b>chemicalpotential_di</b>          | Global chemical potential - diene reactant.                                                      | HSAB <sup>36</sup>     |
| <b>electrophilicity_di</b>           | Global electrophilicity - diene reactant.                                                        | HSAB <sup>36</sup>     |
| <b>sasa_n_di</b>                     | Solvent accessible surface area for each atom n (1, 3, 5, 6) - diene reactant.                   | Freesasa <sup>37</sup> |
| <b>sasa_R1_di</b>                    | Solvent accessible surface area for R1 atom - diene reactant.                                    | Freesasa <sup>37</sup> |
| <b>sasa_total_di</b>                 | Total solvent accessible surface area for core atoms - diene reactant.                           | Freesasa <sup>37</sup> |
| <b>sterimol_R1_L_di</b>              | Sterimol L parameter for R1 substituent - diene reactant.                                        | DBStep <sup>38</sup>   |
| <b>sterimol_R1_Bmin_di</b>           | Sterimol B <sub>min</sub> parameter for R1 substituent - diene reactant.                         | DBStep <sup>38</sup>   |
| <b>sterimol_R1_Bmax_di</b>           | Sterimol B <sub>max</sub> parameter for R1 substituent - diene reactant.                         | DBStep <sup>38</sup>   |
| <b>PBV_n_di</b>                      | Percent buried volume (3.5 Å) for each reacting atom n (1, 3) - diene reactant.                  | DBStep <sup>38</sup>   |
| <b>HBA2_di</b>                       | Number of hydrogen bond acceptors - diene reactant.                                              | Pybel <sup>39</sup>    |
| <b>HBD_di</b>                        | Number of hydrogen bond donors - diene reactant.                                                 | Pybel <sup>39</sup>    |
| <b>nF_di</b>                         | Number of Fluorine atoms - diene reactant.                                                       | Pybel <sup>39</sup>    |
| <b>homoenergies_dp</b>               | HOMO energy - dienophile reactant.                                                               | CCLIB <sup>35</sup>    |
| <b>lumoenergies_dp</b>               | LUMO energy - dienophile reactant.                                                               | CCLIB <sup>35</sup>    |
| <b>hardness_dp</b>                   | Global hardness - dienophile reactant.                                                           | HSAB <sup>36</sup>     |
| <b>softness_dp</b>                   | Global softness - dienophile reactant.                                                           | HSAB <sup>36</sup>     |
| <b>chemicalpotential_dp</b>          | Global chemical potential - dienophile reactant.                                                 | HSAB <sup>36</sup>     |
| <b>electrophilicity_dp</b>           | Global electrophilicity - dienophile reactant.                                                   | HSAB <sup>36</sup>     |
| <b>sasa_n_dp</b>                     | Solvent accessible surface area for each atom n (2, 4) - dienophile reactant.                    | Freesasa <sup>37</sup> |
| <b>sasa_R1_dp</b>                    | Solvent accessible surface area for R1 atom - dienophile reactant.                               | Freesasa <sup>37</sup> |
| <b>sasa_total_dp</b>                 | Total solvent accessible surface area for core atoms - dienophile reactant.                      | Freesasa <sup>37</sup> |
| <b>sterimol_R1_L_dp</b>              | Sterimol L parameter for R1 substituent - dienophile reactant.                                   | DBStep <sup>38</sup>   |
| <b>sterimol_R1_Bmin_dp</b>           | Sterimol B <sub>min</sub> parameter for R1 substituent - dienophile reactant.                    | DBStep <sup>38</sup>   |



|                            |                                                                                      |                      |
|----------------------------|--------------------------------------------------------------------------------------|----------------------|
| <b>sterimol_R1_Bmax_dp</b> | Sterimol $B_{\max}$ parameter for R1 substituent - dienophile reactant.              | DBStep <sup>38</sup> |
| <b>PBV_n_dp</b>            | Percent buried volume (3.5 Å) for each reacting atom n (2, 4) - dienophile reactant. | DBStep <sup>38</sup> |
| <b>HBA2_dp</b>             | Number of hydrogen bond acceptors - dienophile reactant.                             | Pybel <sup>39</sup>  |
| <b>HBD_dp</b>              | Number of hydrogen bond donors - dienophile reactant.                                | Pybel <sup>39</sup>  |
| <b>nF_dp</b>               | Number of Fluorine atoms - dienophile reactant.                                      | Pybel <sup>39</sup>  |

*Table S3 – PM3 extracted features with brief description and source of given feature. Information on the origin of the feature is also included (e.g., reactant or transition state species).*

### 3. Machine Learning

All regression models were built with sklearn.<sup>40</sup> Prior to building and training models, features were standardised using sklearn's StandardScaler. For all regression models, only the X values were standardised. However, for the neural networks (NNs) built with TensorFlow<sup>41</sup>, both the X and y were standardised with their own scalars ensuring that weights generated for the model are scaled in the same way as the input, thus reducing the computational time involved with training.

For all regression models generated using sklearn, an 80% training set was used to predict the DFT quasi-harmonic free energy barrier and the remaining 20% for testing. A similar process was used for NNs built using TensorFlow except for an additional validation set was used, thus the splitting consisted of 64% training, 16% validation, and 20% test sets. To explore the variability within algorithms, various kernels were chosen to be investigated for KRR and SVR models; radial basis function (RBF) and polynomial kernels were employed for both, whilst a Laplacian kernel was also tested for KRR models. Hyperparameter tuning was performed for all regression models built with sklearn utilising sklearn's GridSearchCV to search the hyperparameter space for the best cross validation (CV) MAE (Table S4). 5-fold CV was utilised in training to assess model and hyperparameter combinations. Upon completion of tuning, each regressor was individually fit with the associated best hyperparameters before obtaining predictions on the held-out test set.

The hyperparameter tuning for the NNs were performed using the Hyperband<sup>42</sup> tuner with early stopping implemented to find the best set of hyperparameters. A sequential network architecture was used with 4 hidden layers and dropout layers included after every hidden layer to help prevent overfitting. Other architectures were tested however four hidden layers was found to provide the best average performance and the simplest structure (larger networks result in an increased computational cost for model training and hyperparameter tuning). The hyperparameters tuned were learning rate, number of nodes per layer, hidden layer regularisation value, and dropout rate (for the dropout layers only). Model performance was monitored by generating loss curves on the training and validation sets by rebuilding and refitting the network at each stage with the optimised hyperparameters.

| Model                                                       | Hyperparameters         |                                                                                                                                                                                                                                                                                                                                                                                                                                                                                                   |
|-------------------------------------------------------------|-------------------------|---------------------------------------------------------------------------------------------------------------------------------------------------------------------------------------------------------------------------------------------------------------------------------------------------------------------------------------------------------------------------------------------------------------------------------------------------------------------------------------------------|
|                                                             | Tuning Method           | Search Space                                                                                                                                                                                                                                                                                                                                                                                                                                                                                      |
| <b>Ridge Regression</b> <sup>43</sup>                       | Grid Search             | {'alpha': [1e-6, 1e-5, 1e-4, 1e-3, 1e-2, 1e-1, 1, 10, 100]}                                                                                                                                                                                                                                                                                                                                                                                                                                       |
| <b>Kernel Ridge Regression (RBF)</b> <sup>44</sup>          | Grid Search             | {'alpha': [1e-6, 1e-5, 1e-4, 1e-3, 1e-2, 1e-1, 1, 10, 100], 'gamma': [None, 0.01, 0.025, 0.05, 0.1, 0.25, 0.5, 1]}                                                                                                                                                                                                                                                                                                                                                                                |
| <b>Kernel Ridge Regression (Polynomial)</b> <sup>44</sup>   | Grid Search             | {'alpha': [1e-6, 1e-5, 1e-4, 1e-3, 1e-2, 1e-1, 1, 10, 100], 'gamma': [None, 0.01, 0.025, 0.05, 0.1, 0.25, 0.5, 1]}                                                                                                                                                                                                                                                                                                                                                                                |
| <b>Kernel Ridge Regression (Laplacian)</b> <sup>44</sup>    | Grid Search             | {'alpha': [1e-6, 1e-5, 1e-4, 1e-3, 1e-2, 1e-1, 1, 10, 100], 'gamma': [None, 0.01, 0.025, 0.05, 0.1, 0.25, 0.5, 1]}                                                                                                                                                                                                                                                                                                                                                                                |
| <b>Support Vector Regression (RBF)</b> <sup>45</sup>        | Grid Search             | {'gamma': ['scale', 'auto'], 'epsilon': [0.001, 0.01, 0.025, 0.05, 0.1, 0.25, 0.5, 1], 'C': [0.1, 0.25, 0.5, 1, 2, 5, 10, 20, 30, 50]}                                                                                                                                                                                                                                                                                                                                                            |
| <b>Support Vector Regression (Polynomial)</b> <sup>45</sup> | Grid Search             | {'gamma': ['scale', 'auto'], 'epsilon': [0.001, 0.01, 0.025, 0.05, 0.1, 0.25, 0.5, 1], 'C': [1, 2, 5, 10, 20, 30, 50], 'coef0': [0, 1], 'degree': [1, 2, 3, 4, 5]}                                                                                                                                                                                                                                                                                                                                |
| <b>Sequential Neural Network</b>                            | Hyperband <sup>42</sup> | {'reg_value': [1e-2, 1e-3, 1e-4], 'learning_rate': values=[1e-2, 1e-3, 1e-4], 'dropout_rate1': values=[0.4, 0.3, 0.2, 0.1], 'dropout_rate2': values=[0.4, 0.3, 0.2, 0.1], 'dropout_rate3': values=[0.4, 0.3, 0.2, 0.1], 'dropout_rate4': values=[0.4, 0.3, 0.2, 0.1], 'node_units1': [min_value=64, max_value=512, step=32], 'node_units2': [min_value=64, max_value=512, step=32], 'node_units3': [min_value=64, max_value=512, step=32], 'node_units4': [min_value=64, max_value=512, step=32]} |

Table S4 - All models built using sklearn and TensorFlow with associated tuning method and search space for hyperparameter tuning.

To generate the leave-one-out (LOO) datasets, any diene/dienophile that was enumerated to have a Cl as the R group was removed from the dataset and set as its own leave-one-out dataset (Fig. S3). This was completed for both endo and exo datasets to give certain leave-one-out datasets that are summarised in Table S5. These datasets were subsequently split into train and test sets as previously described.



## 4. Machine Learning Hyperparameters and Metrics

Tables S6 and S7 display the train MAE, test MAE, and test R<sup>2</sup> for each standard ML model built using both the AM1-DFT and PM3-DFT datasets. The associated test errors and hyperparameters for each model are also provided. All results are provided across endo and exo models. Leave-one-out results are displayed in Tables S8-11 with the appropriate hyperparameters, metrics, and test errors.

| AM1 Endo        |                                    |                                   |                     |                                                                                                                                                                                                                       |
|-----------------|------------------------------------|-----------------------------------|---------------------|-----------------------------------------------------------------------------------------------------------------------------------------------------------------------------------------------------------------------|
| Model           | Train MAE / kcal mol <sup>-1</sup> | Test MAE / kcal mol <sup>-1</sup> | Test R <sup>2</sup> | Hyperparameters                                                                                                                                                                                                       |
| Ridge           | 0.771                              | 0.767 ± 0.053                     | 0.969               | {'alpha': 0.01}                                                                                                                                                                                                       |
| KRR (RBF)       | 0.863                              | 0.716 ± 0.062                     | 0.966               | {'alpha': 1e-06, 'gamma': None}                                                                                                                                                                                       |
| KRR (Poly)      | 0.510                              | 0.416 ± 0.032                     | 0.990               | {'alpha': 0.01, 'gamma': None}                                                                                                                                                                                        |
| KRR (Laplacian) | 0.690                              | 0.597 ± 0.047                     | 0.979               | {'alpha': 1e-06, 'gamma': None}                                                                                                                                                                                       |
| SVR (RBF)       | 0.584                              | 0.503 ± 0.041                     | 0.984               | {'C': 50, 'epsilon': 0.001, 'gamma': 'auto'}                                                                                                                                                                          |
| SVR (Poly)      | 0.431                              | 0.403 ± 0.033                     | 0.990               | {'C': 50, 'coef0': 1, 'degree': 2, 'epsilon': 0.025, 'gamma': 'auto'}                                                                                                                                                 |
| NN              | 0.623                              | 0.711 ± 0.046                     | 0.977               | {'reg_value': 0.0001, 'learning_rate': 0.001, 'dropout_rate1': 0.3, 'dropout_rate2': 0.2, 'dropout_rate3': 0.2, 'dropout_rate4': 0.1, 'node_units1': 480, 'node_units2': 416, 'node_units3': 352, 'node_units4': 160} |
| AM1 Exo         |                                    |                                   |                     |                                                                                                                                                                                                                       |
| Ridge           | 0.958                              | 0.964 ± 0.055                     | 0.972               | {'alpha': 1e-05}                                                                                                                                                                                                      |
| KRR (RBF)       | 0.803                              | 0.811 ± 0.074                     | 0.966               | {'alpha': 0.0001, 'gamma': None}                                                                                                                                                                                      |
| KRR (Poly)      | 0.509                              | 0.440 ± 0.038                     | 0.991               | {'alpha': 0.01, 'gamma': None}                                                                                                                                                                                        |
| KRR (Laplacian) | 0.701                              | 0.648 ± 0.050                     | 0.983               | {'alpha': 1e-06, 'gamma': None}                                                                                                                                                                                       |
| SVR (RBF)       | 0.606                              | 0.542 ± 0.043                     | 0.988               | {'C': 50, 'epsilon': 0.001, 'gamma': 'scale'}                                                                                                                                                                         |
| SVR (Poly)      | 0.497                              | 0.394 ± 0.036                     | 0.992               | {'C': 10, 'coef0': 1, 'degree': 3, 'epsilon': 0.01, 'gamma': 'auto'}                                                                                                                                                  |
| NN              | 0.933                              | 1.101 ± 0.079                     | 0.980               | {'reg_value': 0.0001, 'learning_rate': 0.001, 'dropout_rate1': 0.3, 'dropout_rate2': 0.2, 'dropout_rate3': 0.2, 'dropout_rate4': 0.1, 'node_units1': 480, 'node_units2': 416, 'node_units3': 352, 'node_units4': 160} |

Table S6 - AM1-DFT Endo and Exo standard ML train and test set metrics with associated hyperparameters.

| PM3 Endo        |                                    |                                   |                     |                                                                                                                                                                                                                      |
|-----------------|------------------------------------|-----------------------------------|---------------------|----------------------------------------------------------------------------------------------------------------------------------------------------------------------------------------------------------------------|
| Model           | Train MAE / kcal mol <sup>-1</sup> | Test MAE / kcal mol <sup>-1</sup> | Test R <sup>2</sup> | Hyperparameters                                                                                                                                                                                                      |
| Ridge           | 1.055                              | 0.874 ± 0.048                     | 0.961               | {'alpha': 1e-06}                                                                                                                                                                                                     |
| KRR (RBF)       | 0.883                              | 0.718 ± 0.054                     | 0.965               | {'alpha': 1e-06, 'gamma': None}                                                                                                                                                                                      |
| KRR (Poly)      | 0.561                              | 0.463 ± 0.031                     | 0.987               | {'alpha': 0.1, 'gamma': None}                                                                                                                                                                                        |
| KRR (Laplacian) | 0.693                              | 0.614 ± 0.039                     | 0.980               | {'alpha': 1e-06, 'gamma': None}                                                                                                                                                                                      |
| SVR (RBF)       | 0.639                              | 0.517 ± 0.035                     | 0.984               | {'C': 50, 'epsilon': 0.001, 'gamma': 'auto'}                                                                                                                                                                         |
| SVR (Poly)      | 0.529                              | 0.425 ± 0.033                     | 0.987               | {'C': 10, 'coef0': 1, 'degree': 3, 'epsilon': 0.025, 'gamma': 'scale'}                                                                                                                                               |
| NN              | 0.551                              | 0.759 ± 0.043                     | 0.977               | {'reg_value': 0.0001, 'learning_rate': 0.001, 'dropout_rate1': 0.1, 'dropout_rate2': 0.1, 'dropout_rate3': 0.1, 'dropout_rate4': 0.1, 'node_units1': 448, 'node_units2': 352, 'node_units3': 96, 'node_units4': 320} |
| PM3 Exo         |                                    |                                   |                     |                                                                                                                                                                                                                      |
| Ridge           | 1.126                              | 1.231 ± 0.073                     | 0.940               | {'alpha': 1e-05}                                                                                                                                                                                                     |
| KRR (RBF)       | 0.880                              | 0.717 ± 0.055                     | 0.973               | {'alpha': 1e-06, 'gamma': None}                                                                                                                                                                                      |
| KRR (Poly)      | 0.598                              | 0.459 ± 0.033                     | 0.989               | {'alpha': 0.01, 'gamma': None}                                                                                                                                                                                       |
| KRR (Laplacian) | 0.748                              | 0.582 ± 0.037                     | 0.985               | {'alpha': 1e-06, 'gamma': None}                                                                                                                                                                                      |
| SVR (RBF)       | 0.676                              | 0.551 ± 0.038                     | 0.985               | {'C': 30, 'epsilon': 0.001, 'gamma': 'auto'}                                                                                                                                                                         |
| SVR (Poly)      | 0.580                              | 0.432 ± 0.033                     | 0.990               | {'C': 10, 'coef0': 1, 'degree': 3, 'epsilon': 0.001, 'gamma': 'auto'}                                                                                                                                                |
| NN              | 0.648                              | 0.881 ± 0.069                     | 0.973               | {'reg_value': 0.0001, 'learning_rate': 0.001, 'dropout_rate1': 0.1, 'dropout_rate2': 0.1, 'dropout_rate3': 0.1, 'dropout_rate4': 0.1, 'node_units1': 448, 'node_units2': 352, 'node_units3': 96, 'node_units4': 320} |

Table S7 - PM3-DFT Endo and Exo standard ML train and test set metrics with associated hyperparameters.

| AM1 LODiO Endo         |                                    |                                   |                     |                                    |                                                                                                                                                                                                                       |
|------------------------|------------------------------------|-----------------------------------|---------------------|------------------------------------|-----------------------------------------------------------------------------------------------------------------------------------------------------------------------------------------------------------------------|
| Model                  | Train MAE / kcal mol <sup>-1</sup> | Test MAE / kcal mol <sup>-1</sup> | Test R <sup>2</sup> | LODiO MAE / kcal mol <sup>-1</sup> | Hyperparameters                                                                                                                                                                                                       |
| <b>Ridge</b>           | 0.802                              | 0.822 ± 0.064                     | 0.960               | 1.603 ± 0.18                       | {'alpha': 1e-06}                                                                                                                                                                                                      |
| <b>KRR (RBF)</b>       | 0.998                              | 0.761 ± 0.063                     | 0.964               | 1.441 ± 0.236                      | {'alpha': 1e-06, 'gamma': None}                                                                                                                                                                                       |
| <b>KRR (Poly)</b>      | 0.572                              | 0.473 ± 0.036                     | 0.987               | 0.802 ± 0.129                      | {'alpha': 0.01, 'gamma': None}                                                                                                                                                                                        |
| <b>KRR (Laplacian)</b> | 0.760                              | 0.600 ± 0.045                     | 0.980               | 0.758 ± 0.111                      | {'alpha': 1e-06, 'gamma': None}                                                                                                                                                                                       |
| <b>SVR (RBF)</b>       | 0.666                              | 0.483 ± 0.036                     | 0.987               | 0.794 ± 0.116                      | {'C': 30, 'epsilon': 0.001, 'gamma': 'auto'}                                                                                                                                                                          |
| <b>SVR (Poly)</b>      | 0.493                              | 0.443 ± 0.033                     | 0.989               | 1.011 ± 0.119                      | {'C': 30, 'coef0': 1, 'degree': 2, 'epsilon': 0.05, 'gamma': 'scale'}                                                                                                                                                 |
| <b>NN</b>              | 0.533                              | 0.705 ± 0.043                     | 0.976               | 0.977 ± 0.120                      | {'reg_value': 0.0001, 'learning_rate': 0.001, 'dropout_rate1': 0.3, 'dropout_rate2': 0.2, 'dropout_rate3': 0.2, 'dropout_rate4': 0.1, 'node_units1': 480, 'node_units2': 416, 'node_units3': 352, 'node_units4': 160} |
| AM1 LODiO Exo          |                                    |                                   |                     |                                    |                                                                                                                                                                                                                       |
| <b>Ridge</b>           | 0.970                              | 0.994 ± 0.068                     | 0.963               | 1.018 ± 0.167                      | {'alpha': 1e-05}                                                                                                                                                                                                      |
| <b>KRR (RBF)</b>       | 0.929                              | 0.757 ± 0.065                     | 0.972               | 1.717 ± 0.291                      | {'alpha': 0.001, 'gamma': None}                                                                                                                                                                                       |
| <b>KRR (Poly)</b>      | 0.562                              | 0.489 ± 0.043                     | 0.988               | 0.837 ± 0.123                      | {'alpha': 0.01, 'gamma': None}                                                                                                                                                                                        |
| <b>KRR (Laplacian)</b> | 0.767                              | 0.635 ± 0.046                     | 0.983               | 0.878 ± 0.114                      | {'alpha': 1e-06, 'gamma': None}                                                                                                                                                                                       |
| <b>SVR (RBF)</b>       | 0.672                              | 0.564 ± 0.050                     | 0.983               | 0.879 ± 0.117                      | {'C': 50, 'epsilon': 0.001, 'gamma': 'auto'}                                                                                                                                                                          |
| <b>SVR (Poly)</b>      | 0.527                              | 0.501 ± 0.045                     | 0.987               | 0.758 ± 0.114                      | {'C': 10, 'coef0': 1, 'degree': 3, 'epsilon': 0.01, 'gamma': 'scale'}                                                                                                                                                 |
| <b>NN</b>              | 0.792                              | 1.059 ± 0.082                     | 0.953               | 1.036 ± 0.094                      | {'reg_value': 0.001, 'learning_rate': 0.001, 'dropout_rate1': 0.2, 'dropout_rate2': 0.1, 'dropout_rate3': 0.1, 'dropout_rate4': 0.4, 'node_units1': 480, 'node_units2': 288, 'node_units3': 64, 'node_units4': 224}   |

Table S8 - AM1-DFT Endo and Exo leave-one-diene-out standard ML train and test set metrics with associated hyperparameters.

| PM3 LODiO Endo  |                                    |                                   |                     |                                    |                                                                                                                                                                                                                       |
|-----------------|------------------------------------|-----------------------------------|---------------------|------------------------------------|-----------------------------------------------------------------------------------------------------------------------------------------------------------------------------------------------------------------------|
| Model           | Train MAE / kcal mol <sup>-1</sup> | Test MAE / kcal mol <sup>-1</sup> | Test R <sup>2</sup> | LODiO MAE / kcal mol <sup>-1</sup> | Hyperparameters                                                                                                                                                                                                       |
| Ridge           | 1.076                              | 0.925 ± 0.062                     | 0.960               | 2.501 ± 0.196                      | {'alpha': 1e-06}                                                                                                                                                                                                      |
| KRR (RBF)       | 0.963                              | 0.846 ± 0.066                     | 0.961               | 2.061 ± 0.276                      | {'alpha': 0.0001, 'gamma': None}                                                                                                                                                                                      |
| KRR (Poly)      | 0.599                              | 0.551 ± 0.050                     | 0.980               | 1.232 ± 0.223                      | {'alpha': 0.1, 'gamma': None}                                                                                                                                                                                         |
| KRR (Laplacian) | 0.779                              | 0.683 ± 0.048                     | 0.977               | 0.779 ± 0.133                      | {'alpha': 1e-06, 'gamma': None}                                                                                                                                                                                       |
| SVR (RBF)       | 0.670                              | 0.596 ± 0.045                     | 0.981               | 1.006 ± 0.163                      | {'C': 30, 'epsilon': 0.001, 'gamma': 'auto'}                                                                                                                                                                          |
| SVR (Poly)      | 0.566                              | 0.531 ± 0.052                     | 0.980               | 1.042 ± 0.175                      | {'C': 5, 'coef0': 1, 'degree': 3, 'epsilon': 0.001, 'gamma': 'scale'}                                                                                                                                                 |
| NN              | 0.555                              | 0.881 ± 0.074                     | 0.963               | 0.960 ± 0.138                      | {'reg_value': 0.0001, 'learning_rate': 0.001, 'dropout_rate1': 0.1, 'dropout_rate2': 0.1, 'dropout_rate3': 0.1, 'dropout_rate4': 0.1, 'node_units1': 448, 'node_units2': 352, 'node_units3': 96, 'node_units4': 320}  |
| PM3 LODiO Exo   |                                    |                                   |                     |                                    |                                                                                                                                                                                                                       |
| Ridge           | 1.166                              | 1.151 ± 0.065                     | 0.952               | 2.009 ± 0.181                      | {'alpha': 0.01}                                                                                                                                                                                                       |
| KRR (RBF)       | 0.950                              | 0.769 ± 0.062                     | 0.971               | 1.351 ± 0.215                      | {'alpha': 1e-06, 'gamma': None}                                                                                                                                                                                       |
| KRR (Poly)      | 0.631                              | 0.538 ± 0.045                     | 0.985               | 1.01 ± 0.158                       | {'alpha': 0.01, 'gamma': None}                                                                                                                                                                                        |
| KRR (Laplacian) | 0.779                              | 0.654 ± 0.044                     | 0.981               | 0.701 ± 0.077                      | {'alpha': 1e-06, 'gamma': None}                                                                                                                                                                                       |
| SVR (RBF)       | 0.730                              | 0.582 ± 0.045                     | 0.983               | 0.852 ± 0.115                      | {'C': 50, 'epsilon': 0.001, 'gamma': 'auto'}                                                                                                                                                                          |
| SVR (Poly)      | 0.621                              | 0.542 ± 0.046                     | 0.984               | 0.867 ± 0.128                      | {'C': 20, 'coef0': 1, 'degree': 3, 'epsilon': 0.025, 'gamma': 'auto'}                                                                                                                                                 |
| NN              | 0.612                              | 0.887 ± 0.063                     | 0.971               | 0.793 ± 0.103                      | {'reg_value': 0.0001, 'learning_rate': 0.001, 'dropout_rate1': 0.3, 'dropout_rate2': 0.2, 'dropout_rate3': 0.2, 'dropout_rate4': 0.1, 'node_units1': 480, 'node_units2': 416, 'node_units3': 352, 'node_units4': 160} |

Table S9 – PM3-DFT Endo and Exo leave-one-diene-out standard ML train and test set metrics with associated hyperparameters.



| AM1 LODpO Endo         |                                    |                                   |                     |                                    |                                                                                                                                                                                                                        |
|------------------------|------------------------------------|-----------------------------------|---------------------|------------------------------------|------------------------------------------------------------------------------------------------------------------------------------------------------------------------------------------------------------------------|
| Model                  | Train MAE / kcal mol <sup>-1</sup> | Test MAE / kcal mol <sup>-1</sup> | Test R <sup>2</sup> | LODIO MAE / kcal mol <sup>-1</sup> | Hyperparameters                                                                                                                                                                                                        |
| <b>Ridge</b>           | 0.827                              | 0.762 ± 0.045                     | 0.975               | 1.616 ± 0.216                      | {'alpha': 0.01}                                                                                                                                                                                                        |
| <b>KRR (RBF)</b>       | 0.969                              | 0.791 ± 0.073                     | 0.958               | 1.7 ± 0.254                        | {'alpha': 1e-06, 'gamma': None}                                                                                                                                                                                        |
| <b>KRR (Poly)</b>      | 0.564                              | 0.521 ± 0.041                     | 0.984               | 0.612 ± 0.084                      | {'alpha': 0.01, 'gamma': None}                                                                                                                                                                                         |
| <b>KRR (Laplacian)</b> | 0.748                              | 0.672 ± 0.048                     | 0.977               | 0.935 ± 0.162                      | {'alpha': 1e-06, 'gamma': None}                                                                                                                                                                                        |
| <b>SVR (RBF)</b>       | 0.646                              | 0.574 ± 0.053                     | 0.977               | 0.766 ± 0.093                      | {'C': 50, 'epsilon': 0.001, 'gamma': 'auto'}                                                                                                                                                                           |
| <b>SVR (Poly)</b>      | 0.499                              | 0.463 ± 0.035                     | 0.988               | 0.823 ± 0.120                      | {'C': 30, 'coef0': 1, 'degree': 2, 'epsilon': 0.025, 'gamma': 'scale'}                                                                                                                                                 |
| <b>NN</b>              | 0.824                              | 0.913 ± 0.059                     | 0.970               | 0.932 ± 0.104                      | {'reg_value': 0.0001, 'learning_rate': 0.001, 'dropout_rate1': 0.3, 'dropout_rate2': 0.2, 'dropout_rate3': 0.2, 'dropout_rate4': 0.1, 'node_units1': 480, 'node_units2': 416, 'node_units3': 352, 'node_units4': 160}  |
| AM1 LODpO Exo          |                                    |                                   |                     |                                    |                                                                                                                                                                                                                        |
| <b>Ridge</b>           | 0.929                              | 0.914 ± 0.061                     | 0.971               | 3.325 ± 0.472                      | {'alpha': 0.001}                                                                                                                                                                                                       |
| <b>KRR (RBF)</b>       | 0.923                              | 0.688 ± 0.069                     | 0.974               | 1.641 ± 0.214                      | {'alpha': 1e-06, 'gamma': None}                                                                                                                                                                                        |
| <b>KRR (Poly)</b>      | 0.527                              | 0.513 ± 0.048                     | 0.986               | 0.754 ± 0.108                      | {'alpha': 0.01, 'gamma': None}                                                                                                                                                                                         |
| <b>KRR (Laplacian)</b> | 0.777                              | 0.670 ± 0.051                     | 0.982               | 0.868 ± 0.128                      | {'alpha': 1e-06, 'gamma': None}                                                                                                                                                                                        |
| <b>SVR (RBF)</b>       | 0.655                              | 0.624 ± 0.054                     | 0.981               | 0.669 ± 0.126                      | {'C': 50, 'epsilon': 0.001, 'gamma': 'scale'}                                                                                                                                                                          |
| <b>SVR (Poly)</b>      | 0.499                              | 0.474 ± 0.048                     | 0.987               | 1.085 ± 0.149                      | {'C': 50, 'coef0': 1, 'degree': 2, 'epsilon': 0.05, 'gamma': 'auto'}                                                                                                                                                   |
| <b>NN</b>              | 0.955                              | 1.141 ± 0.076                     | 0.973               | 1.213 ± 0.137                      | {'reg_value': 0.0001, 'learning_rate': 0.001, 'dropout_rate1': 0.3, 'dropout_rate2': 0.2, 'dropout_rate3': 0.2, 'dropout_rate4': 0.1, 'node_units1': 480, 'node_units2': 416, 'node_units3': 352, 'node_units4': 160,} |

Table S10 - AM1-DFT Endo and Exo leave-one-dienophile-out standard ML train and test set metrics with associated hyperparameters.

| PM3 LODpO Endo         |                                    |                                   |                     |                                    |                                                                                                                                                                                                                       |
|------------------------|------------------------------------|-----------------------------------|---------------------|------------------------------------|-----------------------------------------------------------------------------------------------------------------------------------------------------------------------------------------------------------------------|
| Model                  | Train MAE / kcal mol <sup>-1</sup> | Test MAE / kcal mol <sup>-1</sup> | Test R <sup>2</sup> | LODIO MAE / kcal mol <sup>-1</sup> | Hyperparameters                                                                                                                                                                                                       |
| <b>Ridge</b>           | 1.007                              | 0.968 ± 0.062                     | 0.956               | 2.975 ± 0.344                      | {'alpha': 0.001}                                                                                                                                                                                                      |
| <b>KRR (RBF)</b>       | 0.950                              | 0.792 ± 0.074                     | 0.958               | 1.350 ± 0.200                      | {'alpha': 1e-05, 'gamma': None}                                                                                                                                                                                       |
| <b>KRR (Poly)</b>      | 0.569                              | 0.489 ± 0.040                     | 0.986               | 0.907 ± 0.109                      | {'alpha': 0.1, 'gamma': None}                                                                                                                                                                                         |
| <b>KRR (Laplacian)</b> | 0.743                              | 0.628 ± 0.051                     | 0.979               | 1.291 ± 0.141                      | {'alpha': 1e-06, 'gamma': None}                                                                                                                                                                                       |
| <b>SVR (RBF)</b>       | 0.669                              | 0.575 ± 0.047                     | 0.982               | 0.869 ± 0.106                      | {'C': 50, 'epsilon': 0.001, 'gamma': 'auto'}                                                                                                                                                                          |
| <b>SVR (Poly)</b>      | 0.536                              | 0.482 ± 0.039                     | 0.987               | 1.261 ± 0.115                      | {'C': 30, 'coef0': 1, 'degree': 2, 'epsilon': 0.01, 'gamma': 'scale'}                                                                                                                                                 |
| <b>NN</b>              | 0.568                              | 0.750 ± 0.047                     | 0.978               | 0.991 ± 0.124                      | {'reg_value': 0.0001, 'learning_rate': 0.001, 'dropout_rate1': 0.3, 'dropout_rate2': 0.2, 'dropout_rate3': 0.2, 'dropout_rate4': 0.1, 'node_units1': 480, 'node_units2': 416, 'node_units3': 352, 'node_units4': 160} |
| PM3 LODpO Exo          |                                    |                                   |                     |                                    |                                                                                                                                                                                                                       |
| <b>Ridge</b>           | 1.121                              | 1.078 ± 0.062                     | 0.954               | 3.346 ± 0.356                      | {'alpha': 0.01}                                                                                                                                                                                                       |
| <b>KRR (RBF)</b>       | 0.897                              | 0.755 ± 0.061                     | 0.97                | 1.301 ± 0.154                      | {'alpha': 1e-06, 'gamma': None}                                                                                                                                                                                       |
| <b>KRR (Poly)</b>      | 0.602                              | 0.552 ± 0.05                      | 0.981               | 0.708 ± 0.096                      | {'alpha': 0.01, 'gamma': None}                                                                                                                                                                                        |
| <b>KRR (Laplacian)</b> | 0.806                              | 0.655 ± 0.045                     | 0.98                | 1.126 ± 0.121                      | {'alpha': 1e-06, 'gamma': None}                                                                                                                                                                                       |
| <b>SVR (RBF)</b>       | 0.692                              | 0.588 ± 0.051                     | 0.98                | 0.671 ± 0.088                      | {'C': 50, 'epsilon': 0.001, 'gamma': 'auto'}                                                                                                                                                                          |
| <b>SVR (Poly)</b>      | 0.599                              | 0.550 ± 0.050                     | 0.981               | 0.762 ± 0.108                      | {'C': 30, 'coef0': 1, 'degree': 3, 'epsilon': 0.05, 'gamma': 'auto'}                                                                                                                                                  |
| <b>NN</b>              | 0.660                              | 0.841 ± 0.064                     | 0.967               | 0.891 ± 0.160                      | {'reg_value': 0.0001, 'learning_rate': 0.001, 'dropout_rate1': 0.3, 'dropout_rate2': 0.2, 'dropout_rate3': 0.2, 'dropout_rate4': 0.1, 'node_units1': 480, 'node_units2': 416, 'node_units3': 352, 'node_units4': 160} |

Table S11 – PM3-DFT Endo and Exo leave-one-dienophile-out standard ML train and test set metrics with associated hyperparameters.

## 5. NN Feature Importances

Feature importances were calculated for the endo and exo NN models by taking each individual feature in the X test and randomly shuffling one feature exclusively and using this new X test to predict y test (Fig. S4). This yields an indication on the importance of a given feature on predictive ability (Fig. S5 and S6). All feature importances are for AM1-DFT endo and exo models.

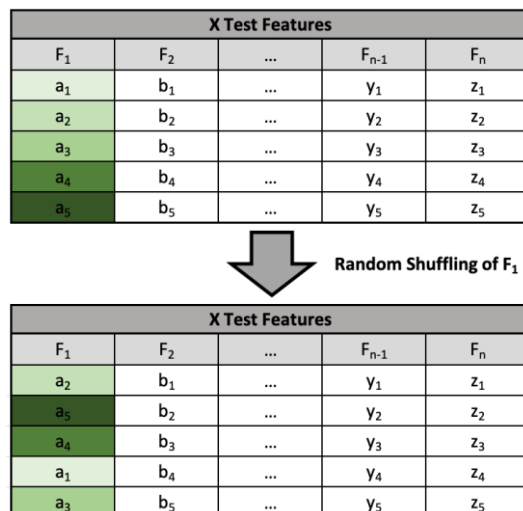

Fig. S4 - Explanation of how feature importances were generated for NNs. Each feature (F<sub>1</sub> through F<sub>2</sub>) is independently shuffled within the X test set and a prediction made on each new set of X test features.

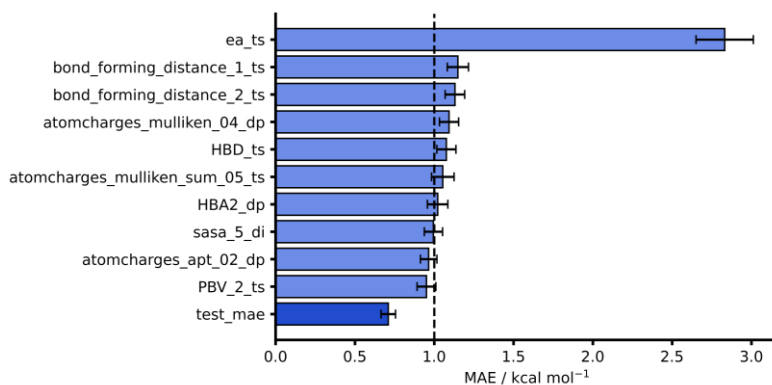

Fig. S5 - Feature Importances for AM1 endo NN. Test MAE (dark blue) plotted with 10 highest test MAEs (light blue) achieved after feature importance analysis.

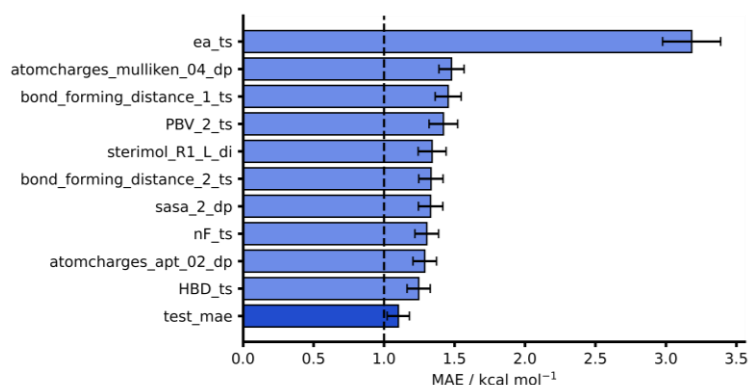

Fig. S6 - Feature Importances for AM1 exo NN. Test MAE (dark blue) plotted with 10 highest test MAEs (light blue) achieved after feature importance analysis.

## 6. TL Datasets

The whole dataset created was partitioned into different enumerations and Diels-Alder reaction classes to provide TL datasets. These partitions yielded source domain A and source domain B, which were paired with target domains  $\alpha$  and  $\beta$ , respectively, for TL (Fig. S7 and S8). The enumeration used for generating the [3+2] cycloaddition dataset is also included here (Fig. S9). For the [3+2] cycloaddition dataset, a broadly representative sample was selected from a recently published dataset<sup>46</sup> and enumerated and calculated with our workflow to generate a dataset of 420 [3+2] cycloaddition reactions.

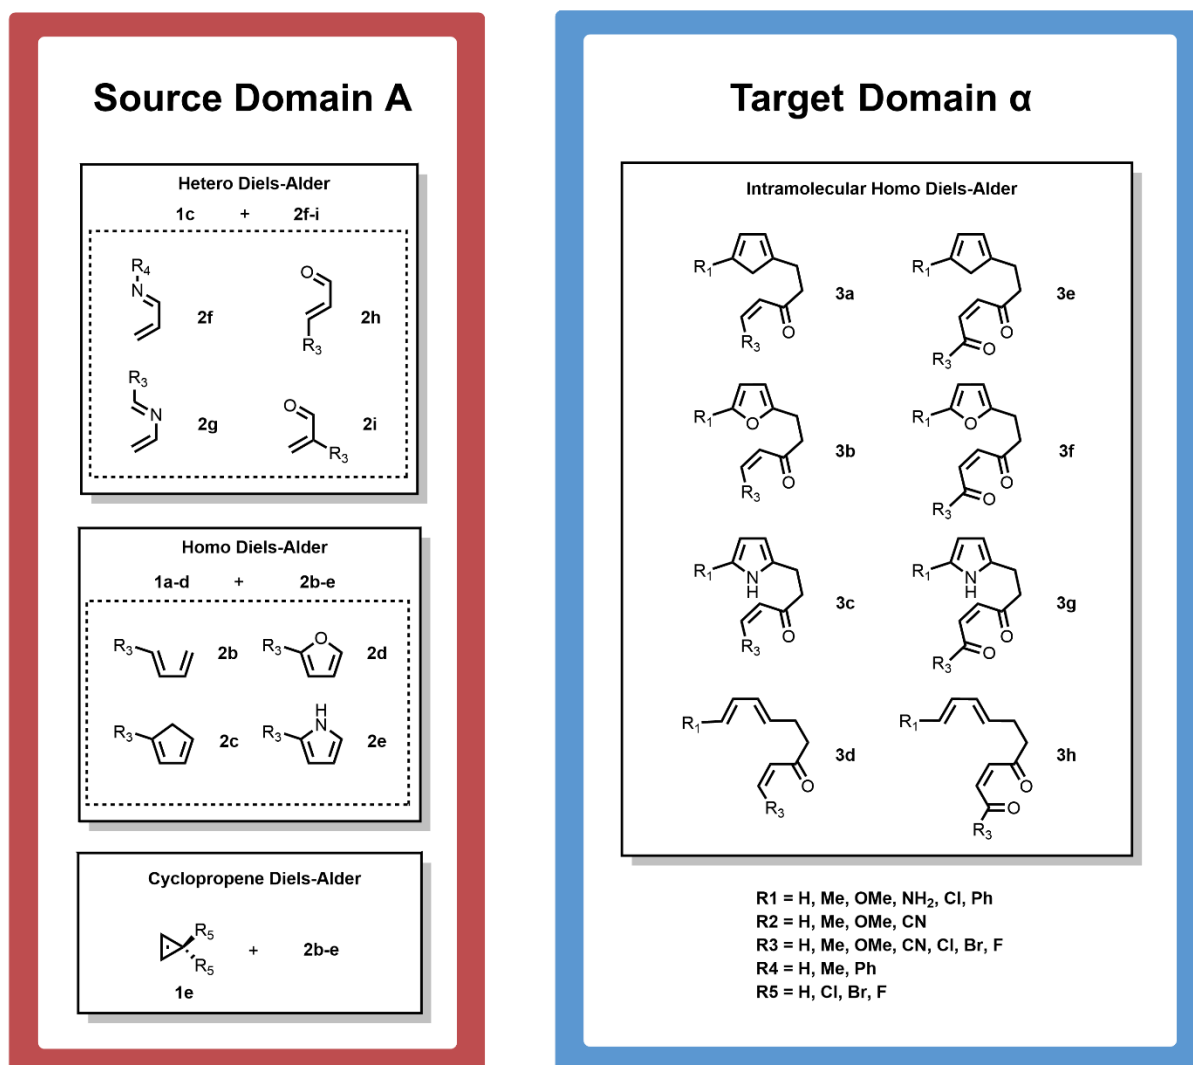

Fig. S7 - Partition of data to create source domain A and target domain  $\alpha$ . Source domain A contains hetero/homo and cyclopropane-containing intermolecular Diels-Alder reactions. Target domain  $\alpha$  contains intramolecular Diels-Alder reactions.

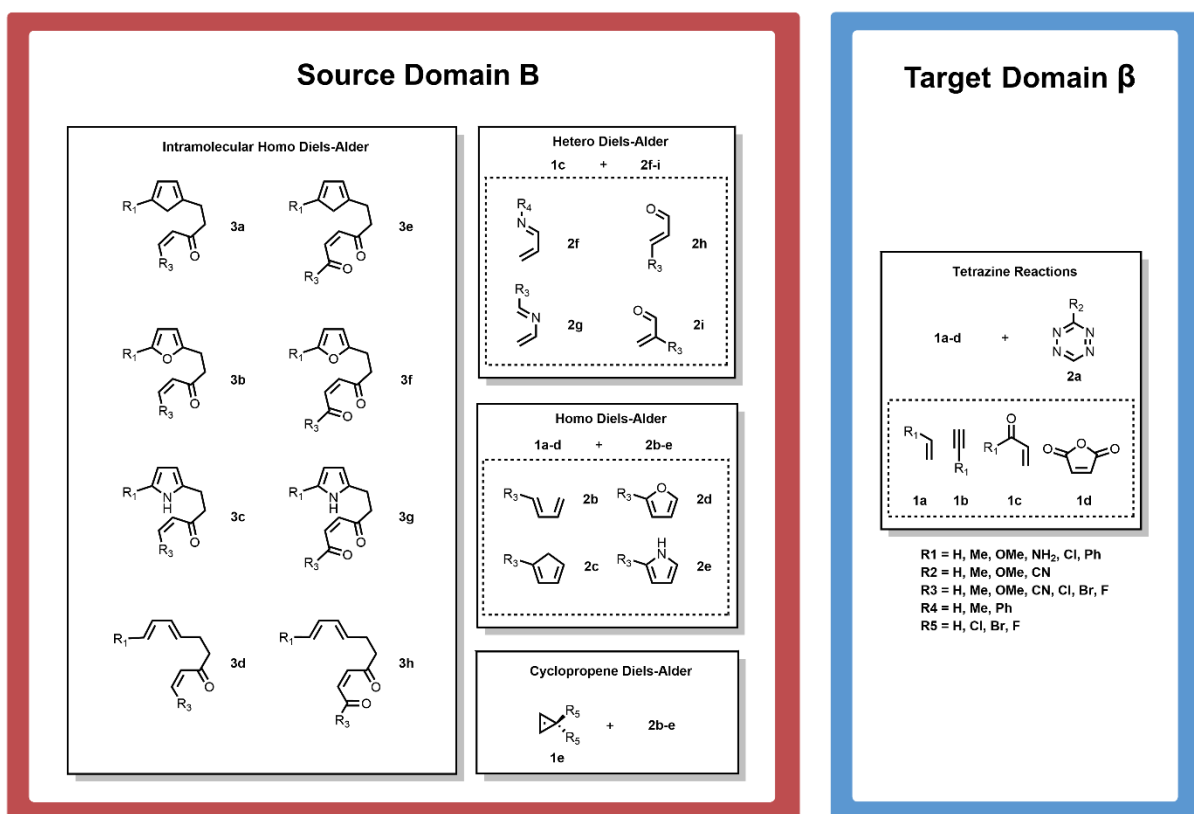

Fig. S8 - Partition of data to create source domain B and target domain β. Source domain B contains hetero/homo and cyclopropane-containing intermolecular Diels-Alder reactions along with intramolecular Diels-Alder reactions. Target domain β contains tetrazine Diels-Alder reactions.

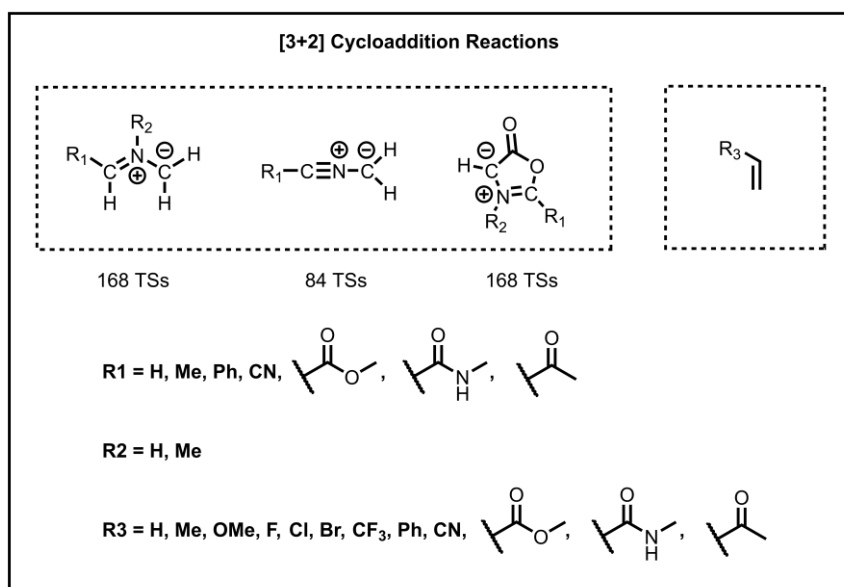

Figure S9 - Enumerated [3+2] cycloaddition dataset used as target domain hTL. The source domain for this hTL was the B source domain from Fig. S7. Out of the 420 possible enumerated reactions, 408 were successfully optimised at the DFT level of theory. Extensive attempts to optimise the TSs of the remaining 12 reactions were unsuccessful.

## 7. hTL Metrics

Table S12 show metrics for before and after the hTL procedure. Tables S13-S16 show the test and train MAEs for the hTL work with associated errors at three random states across different hTL training percentage splits. This work was performed on the AM1-DFT dataset. hTL was also performed for an enumerated group of [3+2] reactions to provide an extended test (Table S17 and S18 for test and train metrics respectively).

| AM1 hTL Endo |                                         |                                        |                          |                                          |                                        |                          |
|--------------|-----------------------------------------|----------------------------------------|--------------------------|------------------------------------------|----------------------------------------|--------------------------|
| Model        | Base Train MAE / kcal mol <sup>-1</sup> | Base Test MAE / kcal mol <sup>-1</sup> | Base Test R <sup>2</sup> | Base Target MAE / kcal mol <sup>-1</sup> | TL Target MAE / kcal mol <sup>-1</sup> | TL Target R <sup>2</sup> |
| <b>A → α</b> | 0.503                                   | 0.647 ± 0.045                          | 0.974                    | 5.090 ± 0.443                            | 0.946 ± 0.085                          | 0.987                    |
| <b>B → β</b> | 0.623                                   | 0.711 ± 0.046                          | 0.977                    | 1.921 ± 0.325                            | 0.932 ± 0.191                          | 0.783                    |
| AM1 hTL Exo  |                                         |                                        |                          |                                          |                                        |                          |
| <b>A → α</b> | 0.464                                   | 0.680 ± 0.043                          | 0.978                    | 4.953 ± 0.413                            | 1.039 ± 0.100                          | 0.985                    |
| <b>B → β</b> | 0.933                                   | 1.101 ± 0.079                          | 0.980                    | 3.318 ± 0.399                            | 1.242 ± 0.198                          | 0.741                    |

Table S12 – AM1-DFT endo and exo train and base/hTL test metrics. Test metrics for the target are provided for before and after hTL was performed.

| A → α Endo Test MAE / kcal mol <sup>-1</sup> hTL Train Percentages |               |               |               |               |
|--------------------------------------------------------------------|---------------|---------------|---------------|---------------|
| Percent of Training Data                                           | Random State  |               |               | Average       |
|                                                                    | 21            | 22            | 23            |               |
| <b>10</b>                                                          | 2.540 ± 0.327 | 2.235 ± 0.256 | 2.839 ± 0.316 | 2.538 ± 0.299 |
| <b>20</b>                                                          | 2.361 ± 0.236 | 1.576 ± 0.220 | 1.849 ± 0.224 | 1.928 ± 0.227 |
| <b>30</b>                                                          | 1.480 ± 0.171 | 1.220 ± 0.136 | 1.629 ± 0.155 | 1.443 ± 0.154 |
| <b>40</b>                                                          | 1.395 ± 0.135 | 1.295 ± 0.146 | 1.705 ± 0.167 | 1.465 ± 0.149 |
| <b>50</b>                                                          | 1.164 ± 0.133 | 1.219 ± 0.139 | 1.159 ± 0.096 | 1.181 ± 0.123 |
| <b>60</b>                                                          | 1.160 ± 0.122 | 1.290 ± 0.120 | 1.216 ± 0.127 | 1.222 ± 0.123 |
| <b>70</b>                                                          | 0.993 ± 0.108 | 1.082 ± 0.116 | 1.051 ± 0.092 | 1.042 ± 0.105 |
| <b>80</b>                                                          | 0.947 ± 0.089 | 0.999 ± 0.107 | 0.914 ± 0.077 | 0.953 ± 0.091 |
| <b>90</b>                                                          | 0.917 ± 0.093 | 0.943 ± 0.105 | 0.790 ± 0.072 | 0.883 ± 0.090 |
| <b>100</b>                                                         | 0.835 ± 0.098 | 0.889 ± 0.093 | 0.946 ± 0.085 | 0.890 ± 0.092 |
| A → α Exo Test MAE / kcal mol <sup>-1</sup> hTL Train Percentages  |               |               |               |               |
| <b>10</b>                                                          | 2.769 ± 0.282 | 2.198 ± 0.208 | 2.746 ± 0.267 | 2.571 ± 0.252 |
| <b>20</b>                                                          | 1.813 ± 0.207 | 2.891 ± 0.315 | 1.962 ± 0.195 | 2.222 ± 0.239 |
| <b>30</b>                                                          | 1.514 ± 0.156 | 1.189 ± 0.141 | 1.458 ± 0.159 | 1.387 ± 0.152 |
| <b>40</b>                                                          | 1.745 ± 0.210 | 1.362 ± 0.159 | 1.712 ± 0.186 | 1.606 ± 0.185 |
| <b>50</b>                                                          | 1.321 ± 0.130 | 1.314 ± 0.134 | 1.358 ± 0.155 | 1.331 ± 0.140 |
| <b>60</b>                                                          | 1.038 ± 0.114 | 1.155 ± 0.127 | 1.115 ± 0.121 | 1.102 ± 0.121 |
| <b>70</b>                                                          | 1.171 ± 0.125 | 1.486 ± 0.158 | 1.501 ± 0.131 | 1.386 ± 0.138 |
| <b>80</b>                                                          | 0.963 ± 0.100 | 1.028 ± 0.110 | 1.031 ± 0.114 | 1.007 ± 0.108 |
| <b>90</b>                                                          | 1.107 ± 0.118 | 1.064 ± 0.100 | 0.925 ± 0.107 | 1.032 ± 0.108 |
| <b>100</b>                                                         | 0.794 ± 0.078 | 1.016 ± 0.100 | 1.039 ± 0.100 | 0.950 ± 0.093 |

Table S13 - AM1-DFT A → α endo and exo hTL test MAEs across three random states (21,22,23) with averaged MAEs. Metrics provided for different percentages of hTL training data.

| A → $\alpha$ Endo Train MAE / kcal mol <sup>-1</sup> hTL Train Percentages |              |       |       |         |
|----------------------------------------------------------------------------|--------------|-------|-------|---------|
| Percent of Training Data                                                   | Random State |       |       | Average |
|                                                                            | 21           | 22    | 23    |         |
| <b>10</b>                                                                  | 1.073        | 0.859 | 1.078 | 1.003   |
| <b>20</b>                                                                  | 1.046        | 0.920 | 0.810 | 0.925   |
| <b>30</b>                                                                  | 0.571        | 0.600 | 0.772 | 0.648   |
| <b>40</b>                                                                  | 0.861        | 0.677 | 0.865 | 0.801   |
| <b>50</b>                                                                  | 0.598        | 0.433 | 0.802 | 0.611   |
| <b>60</b>                                                                  | 0.694        | 0.753 | 0.634 | 0.693   |
| <b>70</b>                                                                  | 0.489        | 0.415 | 0.475 | 0.460   |
| <b>80</b>                                                                  | 0.606        | 0.485 | 0.542 | 0.544   |
| <b>90</b>                                                                  | 0.470        | 0.409 | 0.393 | 0.424   |
| <b>100</b>                                                                 | 0.590        | 0.506 | 0.614 | 0.570   |
| A → $\alpha$ Exo Train MAE / kcal mol <sup>-1</sup> hTL Train Percentages  |              |       |       |         |
| <b>10</b>                                                                  | 1.010        | 0.468 | 1.404 | 0.961   |
| <b>20</b>                                                                  | 1.130        | 1.142 | 1.207 | 1.160   |
| <b>30</b>                                                                  | 0.879        | 0.502 | 0.608 | 0.663   |
| <b>40</b>                                                                  | 0.936        | 0.764 | 0.838 | 0.846   |
| <b>50</b>                                                                  | 0.931        | 0.747 | 0.912 | 0.863   |
| <b>60</b>                                                                  | 0.546        | 0.825 | 0.579 | 0.650   |
| <b>70</b>                                                                  | 0.866        | 1.093 | 0.873 | 0.944   |
| <b>80</b>                                                                  | 0.620        | 0.533 | 0.568 | 0.574   |
| <b>90</b>                                                                  | 0.748        | 0.592 | 0.483 | 0.607   |
| <b>100</b>                                                                 | 0.499        | 0.671 | 0.753 | 0.641   |

Table S14 - AM1-DFT A →  $\alpha$  endo and exo hTL train MAEs across three random states (21,22,23) with averaged MAEs. Metrics provided for different percentages of hTL training data.

| B → $\beta$ Endo Test MAE / kcal mol <sup>-1</sup> hTL Train Percentages |               |               |               |               |
|--------------------------------------------------------------------------|---------------|---------------|---------------|---------------|
| Percent of Training Data                                                 | Random State  |               |               | Average       |
|                                                                          | 21            | 22            | 23            |               |
| <b>10</b>                                                                | 1.843 ± 0.336 | 1.255 ± 0.224 | 1.698 ± 0.340 | 1.599 ± 0.300 |
| <b>20</b>                                                                | 1.470 ± 0.258 | 1.774 ± 0.189 | 1.835 ± 0.316 | 1.693 ± 0.254 |
| <b>30</b>                                                                | 1.529 ± 0.222 | 0.977 ± 0.154 | 1.315 ± 0.272 | 1.274 ± 0.216 |
| <b>40</b>                                                                | 0.997 ± 0.156 | 1.036 ± 0.162 | 1.262 ± 0.189 | 1.098 ± 0.169 |
| <b>50</b>                                                                | 1.163 ± 0.138 | 0.910 ± 0.161 | 0.896 ± 0.152 | 0.989 ± 0.150 |
| <b>60</b>                                                                | 1.241 ± 0.206 | 0.681 ± 0.156 | 0.911 ± 0.126 | 0.944 ± 0.163 |
| <b>70</b>                                                                | 1.135 ± 0.185 | 0.789 ± 0.150 | 0.675 ± 0.126 | 0.866 ± 0.154 |
| <b>80</b>                                                                | 1.166 ± 0.205 | 0.760 ± 0.118 | 0.571 ± 0.112 | 0.832 ± 0.145 |
| <b>90</b>                                                                | 0.912 ± 0.136 | 0.388 ± 0.080 | 0.658 ± 0.126 | 0.653 ± 0.114 |
| <b>100</b>                                                               | 1.031 ± 0.145 | 0.618 ± 0.128 | 0.932 ± 0.191 | 0.860 ± 0.155 |
| B → $\beta$ Exo Test MAE / kcal mol <sup>-1</sup> hTL Train Percentages  |               |               |               |               |
| <b>10</b>                                                                | 2.009 ± 0.314 | 2.797 ± 0.325 | 2.124 ± 0.354 | 2.310 ± 0.331 |
| <b>20</b>                                                                | 1.680 ± 0.203 | 1.554 ± 0.232 | 1.789 ± 0.260 | 1.674 ± 0.231 |
| <b>30</b>                                                                | 1.217 ± 0.172 | 1.200 ± 0.168 | 1.392 ± 0.213 | 1.270 ± 0.184 |
| <b>40</b>                                                                | 1.174 ± 0.202 | 1.197 ± 0.255 | 1.329 ± 0.182 | 1.233 ± 0.213 |
| <b>50</b>                                                                | 1.126 ± 0.181 | 1.348 ± 0.217 | 0.704 ± 0.146 | 1.059 ± 0.181 |
| <b>60</b>                                                                | 1.077 ± 0.179 | 0.993 ± 0.194 | 0.784 ± 0.102 | 0.951 ± 0.158 |
| <b>70</b>                                                                | 1.184 ± 0.192 | 0.771 ± 0.153 | 0.767 ± 0.128 | 0.907 ± 0.158 |
| <b>80</b>                                                                | 1.151 ± 0.190 | 0.559 ± 0.090 | 0.665 ± 0.116 | 0.791 ± 0.132 |
| <b>90</b>                                                                | 0.880 ± 0.130 | 0.632 ± 0.113 | 0.631 ± 0.150 | 0.715 ± 0.131 |
| <b>100</b>                                                               | 1.016 ± 0.134 | 0.814 ± 0.134 | 1.242 ± 0.198 | 1.024 ± 0.155 |

Table S15 - AM1-DFT B →  $\beta$ endo and exo hTL test MAEs across three random states (21,22,23) with averaged MAEs. Metrics provided for different percentages of hTL training data.



| B → $\beta$ Endo Train MAE / kcal mol <sup>-1</sup> hTL Train Percentages |              |       |       |         |
|---------------------------------------------------------------------------|--------------|-------|-------|---------|
| Percent of Training Data                                                  | Random State |       |       | Average |
|                                                                           | 21           | 22    | 23    |         |
| <b>10</b>                                                                 | 1.595        | 0.984 | 1.039 | 1.206   |
| <b>20</b>                                                                 | 0.885        | 1.143 | 0.866 | 0.965   |
| <b>30</b>                                                                 | 0.938        | 0.605 | 0.616 | 0.720   |
| <b>40</b>                                                                 | 0.460        | 0.383 | 0.721 | 0.521   |
| <b>50</b>                                                                 | 0.704        | 0.798 | 0.496 | 0.666   |
| <b>60</b>                                                                 | 0.928        | 0.658 | 0.599 | 0.728   |
| <b>70</b>                                                                 | 0.387        | 0.560 | 0.427 | 0.458   |
| <b>80</b>                                                                 | 0.478        | 0.437 | 0.385 | 0.433   |
| <b>90</b>                                                                 | 0.379        | 0.438 | 0.278 | 0.365   |
| <b>100</b>                                                                | 0.625        | 0.697 | 0.854 | 0.725   |
| B → $\beta$ Exo Train MAE / kcal mol <sup>-1</sup> hTL Train Percentages  |              |       |       |         |
| <b>10</b>                                                                 | 1.901        | 1.960 | 1.079 | 1.647   |
| <b>20</b>                                                                 | 0.885        | 1.177 | 1.142 | 1.068   |
| <b>30</b>                                                                 | 0.822        | 0.927 | 1.084 | 0.944   |
| <b>40</b>                                                                 | 0.657        | 0.718 | 0.923 | 0.766   |
| <b>50</b>                                                                 | 0.379        | 0.808 | 0.576 | 0.588   |
| <b>60</b>                                                                 | 0.454        | 0.811 | 0.617 | 0.627   |
| <b>70</b>                                                                 | 0.416        | 0.451 | 0.445 | 0.437   |
| <b>80</b>                                                                 | 0.421        | 0.424 | 0.394 | 0.413   |
| <b>90</b>                                                                 | 0.361        | 0.324 | 0.382 | 0.356   |
| <b>100</b>                                                                | 0.867        | 0.959 | 1.106 | 0.977   |

Table S16 - AM1-DFT B →  $\beta$ endo and exo hTL train MAEs across three random states (21,22,23) with averaged MAEs. Metrics provided for different percentages of hTL training data.

| B → [3+2] Endo Test MAE / kcal mol <sup>-1</sup> hTL Train Percentages |               |               |               |               |
|------------------------------------------------------------------------|---------------|---------------|---------------|---------------|
| Percent of Training Data                                               | Random State  |               |               | Average       |
|                                                                        | 21            | 22            | 23            |               |
| <b>10</b>                                                              | 2.137 ± 0.188 | 1.801 ± 0.148 | 2.126 ± 0.204 | 2.021 ± 0.180 |
| <b>20</b>                                                              | 1.976 ± 0.183 | 1.539 ± 0.141 | 1.382 ± 0.117 | 1.632 ± 0.147 |
| <b>30</b>                                                              | 1.748 ± 0.176 | 1.312 ± 0.124 | 1.098 ± 0.095 | 1.386 ± 0.132 |
| <b>40</b>                                                              | 1.388 ± 0.147 | 1.063 ± 0.107 | 1.461 ± 0.149 | 1.304 ± 0.134 |
| <b>50</b>                                                              | 1.194 ± 0.128 | 1.017 ± 0.090 | 1.366 ± 0.158 | 1.192 ± 0.125 |
| <b>60</b>                                                              | 0.912 ± 0.120 | 0.812 ± 0.086 | 0.895 ± 0.101 | 0.873 ± 0.102 |
| <b>70</b>                                                              | 1.102 ± 0.114 | 0.724 ± 0.073 | 0.752 ± 0.087 | 0.859 ± 0.092 |
| <b>80</b>                                                              | 0.734 ± 0.082 | 0.648 ± 0.066 | 0.747 ± 0.087 | 0.710 ± 0.078 |
| <b>90</b>                                                              | 0.977 ± 0.126 | 0.670 ± 0.079 | 0.772 ± 0.092 | 0.806 ± 0.099 |
| <b>100</b>                                                             | 0.822 ± 0.113 | 0.774 ± 0.077 | 0.669 ± 0.082 | 0.755 ± 0.091 |
| B → [3+2] Exo Test MAE / kcal mol <sup>-1</sup> hTL Train Percentages  |               |               |               |               |
| <b>10</b>                                                              | 1.813 ± 0.187 | 1.880 ± 0.180 | 2.451 ± 0.215 | 2.048 ± 0.194 |
| <b>20</b>                                                              | 1.759 ± 0.178 | 1.380 ± 0.127 | 1.480 ± 0.120 | 1.540 ± 0.142 |
| <b>30</b>                                                              | 1.495 ± 0.150 | 1.338 ± 0.137 | 1.250 ± 0.122 | 1.361 ± 0.136 |
| <b>40</b>                                                              | 1.327 ± 0.133 | 1.085 ± 0.118 | 1.289 ± 0.124 | 1.233 ± 0.125 |
| <b>50</b>                                                              | 1.392 ± 0.142 | 0.945 ± 0.085 | 1.336 ± 0.149 | 1.224 ± 0.126 |
| <b>60</b>                                                              | 0.974 ± 0.120 | 0.689 ± 0.077 | 1.122 ± 0.126 | 0.928 ± 0.108 |
| <b>70</b>                                                              | 0.943 ± 0.105 | 0.627 ± 0.066 | 0.850 ± 0.108 | 0.807 ± 0.093 |
| <b>80</b>                                                              | 0.806 ± 0.091 | 0.736 ± 0.066 | 1.044 ± 0.095 | 0.862 ± 0.084 |
| <b>90</b>                                                              | 0.834 ± 0.106 | 0.713 ± 0.075 | 0.772 ± 0.080 | 0.773 ± 0.087 |
| <b>100</b>                                                             | 1.257 ± 0.142 | 0.904 ± 0.081 | 0.715 ± 0.071 | 0.959 ± 0.098 |

Table S17 - AM1-DFT B → [3+2] endo and exo hTL test MAEs across three random states (21,22,23) with averaged MAEs. Metrics provided for different percentages of hTL training data.

| B → [3+2] Endo Train MAE / kcal mol <sup>-1</sup> hTL Train Percentages |              |       |       |         |
|-------------------------------------------------------------------------|--------------|-------|-------|---------|
| Percent of Training Data                                                | Random State |       |       | Average |
|                                                                         | 21           | 22    | 23    |         |
| <b>10</b>                                                               | 1.071        | 0.723 | 1.432 | 1.075   |
| <b>20</b>                                                               | 0.826        | 0.817 | 0.676 | 0.773   |
| <b>30</b>                                                               | 0.821        | 0.663 | 0.529 | 0.671   |
| <b>40</b>                                                               | 0.737        | 0.800 | 0.975 | 0.837   |
| <b>50</b>                                                               | 0.630        | 0.689 | 0.843 | 0.720   |
| <b>60</b>                                                               | 0.438        | 0.534 | 0.507 | 0.493   |
| <b>70</b>                                                               | 0.670        | 0.473 | 0.531 | 0.558   |
| <b>80</b>                                                               | 0.508        | 0.453 | 0.416 | 0.459   |
| <b>90</b>                                                               | 0.509        | 0.450 | 0.624 | 0.528   |
| <b>100</b>                                                              | 0.425        | 0.534 | 0.504 | 0.488   |
| B → [3+2] Exo Train MAE / kcal mol <sup>-1</sup> hTL Train Percentages  |              |       |       |         |
| <b>10</b>                                                               | 0.812        | 0.801 | 1.434 | 1.016   |
| <b>20</b>                                                               | 0.629        | 0.691 | 0.592 | 0.637   |
| <b>30</b>                                                               | 0.528        | 0.778 | 0.775 | 0.694   |
| <b>40</b>                                                               | 0.457        | 1.085 | 1.121 | 0.888   |
| <b>50</b>                                                               | 0.676        | 0.603 | 1.060 | 0.780   |
| <b>60</b>                                                               | 0.452        | 0.448 | 0.736 | 0.545   |
| <b>70</b>                                                               | 0.544        | 0.411 | 0.465 | 0.473   |
| <b>80</b>                                                               | 0.399        | 0.550 | 0.932 | 0.627   |
| <b>90</b>                                                               | 0.413        | 0.452 | 0.547 | 0.470   |
| <b>100</b>                                                              | 0.817        | 0.514 | 0.520 | 0.617   |

Table S18 - AM1-DFT B → [3+2] endo and exo hTL train MAEs across three random states (21,22,23) with averaged MAEs. Metrics provided for different percentages of hTL training data.

## 8. dTL Metrics

Table S19 displays metrics for before and after the dTL procedure. Table S20 and S21 show the test and train MAEs for the dTL work with associated errors at three random states across different dTL training percentage splits. This work was performed on the AM1-DFT dataset from source domain B to target domain  $\beta$ .

| AM1 dTL Endo                  |                                         |                                        |                          |                                          |                                        |                          |
|-------------------------------|-----------------------------------------|----------------------------------------|--------------------------|------------------------------------------|----------------------------------------|--------------------------|
| Model                         | Base Train MAE / kcal mol <sup>-1</sup> | Base Test MAE / kcal mol <sup>-1</sup> | Base Test R <sup>2</sup> | Base Target MAE / kcal mol <sup>-1</sup> | TL Target MAE / kcal mol <sup>-1</sup> | TL Target R <sup>2</sup> |
| <b>B → <math>\beta</math></b> | 0.623                                   | 0.711 ± 0.046                          | 0.977                    | 10.920 ± 0.492                           | 1.584 ± 0.284                          | 0.557                    |
| AM1 dTL Exo                   |                                         |                                        |                          |                                          |                                        |                          |
| <b>B → <math>\beta</math></b> | 0.933                                   | 1.101 ± 0.079                          | 0.980                    | 10.155 ± 0.721                           | 0.781 ± 0.150                          | 0.854                    |

Table S19 - AM1-DFT endo and exo train and base/dTL test metrics. Test metrics for the target are provided for before and after dTL was performed.

| B → $\beta$ Endo Test MAE / kcal mol <sup>-1</sup> dTL Train Percentages |               |               |               |               |
|--------------------------------------------------------------------------|---------------|---------------|---------------|---------------|
| Percent of Training Data                                                 | Random State  |               |               | Average       |
|                                                                          | 21            | 22            | 23            |               |
| <b>10</b>                                                                | 2.368 ± 0.418 | 2.630 ± 0.352 | 2.290 ± 0.378 | 2.430 ± 0.383 |
| <b>20</b>                                                                | 1.748 ± 0.263 | 1.900 ± 0.286 | 1.999 ± 0.319 | 1.883 ± 0.289 |
| <b>30</b>                                                                | 1.428 ± 0.231 | 1.508 ± 0.212 | 1.746 ± 0.381 | 1.561 ± 0.275 |
| <b>40</b>                                                                | 1.262 ± 0.166 | 1.020 ± 0.187 | 1.375 ± 0.161 | 1.219 ± 0.171 |
| <b>50</b>                                                                | 1.301 ± 0.194 | 1.232 ± 0.210 | 0.839 ± 0.153 | 1.124 ± 0.182 |
| <b>60</b>                                                                | 1.274 ± 0.213 | 0.996 ± 0.158 | 1.036 ± 0.156 | 1.102 ± 0.176 |
| <b>70</b>                                                                | 1.476 ± 0.209 | 0.797 ± 0.184 | 0.759 ± 0.129 | 1.011 ± 0.174 |
| <b>80</b>                                                                | 1.299 ± 0.221 | 0.811 ± 0.156 | 0.862 ± 0.141 | 0.991 ± 0.173 |
| <b>90</b>                                                                | 1.167 ± 0.170 | 0.883 ± 0.161 | 0.647 ± 0.148 | 0.899 ± 0.160 |
| <b>100</b>                                                               | 1.354 ± 0.233 | 1.146 ± 0.199 | 1.584 ± 0.284 | 1.361 ± 0.239 |
| B → $\beta$ Exo Test MAE / kcal mol <sup>-1</sup> dTL Train Percentages  |               |               |               |               |
| <b>10</b>                                                                | 2.562 ± 0.427 | 2.597 ± 0.366 | 2.486 ± 0.340 | 2.548 ± 0.378 |
| <b>20</b>                                                                | 1.802 ± 0.271 | 2.165 ± 0.268 | 2.776 ± 0.350 | 2.248 ± 0.296 |
| <b>30</b>                                                                | 1.809 ± 0.307 | 1.288 ± 0.227 | 1.824 ± 0.310 | 1.640 ± 0.282 |
| <b>40</b>                                                                | 1.193 ± 0.291 | 1.194 ± 0.232 | 1.372 ± 0.186 | 1.253 ± 0.236 |
| <b>50</b>                                                                | 1.229 ± 0.182 | 1.463 ± 0.179 | 0.851 ± 0.165 | 1.18 ± 0.175  |
| <b>60</b>                                                                | 1.112 ± 0.184 | 1.104 ± 0.160 | 0.700 ± 0.122 | 0.972 ± 0.155 |
| <b>70</b>                                                                | 1.261 ± 0.213 | 1.023 ± 0.182 | 0.817 ± 0.124 | 1.033 ± 0.173 |
| <b>80</b>                                                                | 1.502 ± 0.249 | 1.146 ± 0.187 | 0.790 ± 0.134 | 1.146 ± 0.190 |
| <b>90</b>                                                                | 1.376 ± 0.203 | 0.970 ± 0.171 | 0.762 ± 0.142 | 1.036 ± 0.172 |
| <b>100</b>                                                               | 1.821 ± 0.310 | 1.076 ± 0.171 | 0.781 ± 0.150 | 1.226 ± 0.210 |

Table S20 - AM1-DFT B →  $\beta$  endo and exo dTL test MAEs across three random states (21,22,23) with averaged MAEs. Metrics provided for different percentages of dTL training data.

| B → β Endo Train MAE / kcal mol <sup>-1</sup> dTL Train Percentages |              |       |       |         |
|---------------------------------------------------------------------|--------------|-------|-------|---------|
| Percent of Training Data                                            | Random State |       |       | Average |
|                                                                     | 21           | 22    | 23    |         |
| <b>10</b>                                                           | 1.206        | 2.035 | 1.145 | 1.462   |
| <b>20</b>                                                           | 0.833        | 1.716 | 0.966 | 1.172   |
| <b>30</b>                                                           | 0.887        | 0.908 | 1.166 | 0.987   |
| <b>40</b>                                                           | 0.700        | 1.054 | 0.809 | 0.854   |
| <b>50</b>                                                           | 0.741        | 0.808 | 0.527 | 0.692   |
| <b>60</b>                                                           | 0.549        | 0.629 | 0.855 | 0.678   |
| <b>70</b>                                                           | 0.796        | 0.523 | 0.423 | 0.581   |
| <b>80</b>                                                           | 0.690        | 0.523 | 0.595 | 0.603   |
| <b>90</b>                                                           | 0.430        | 0.633 | 0.469 | 0.511   |
| <b>100</b>                                                          | 0.759        | 1.130 | 1.167 | 1.019   |
| B → β Exo Train MAE / kcal mol <sup>-1</sup> dTL Train Percentages  |              |       |       |         |
| <b>10</b>                                                           | 1.953        | 2.497 | 1.057 | 1.836   |
| <b>20</b>                                                           | 0.570        | 1.634 | 1.305 | 1.170   |
| <b>30</b>                                                           | 1.331        | 1.035 | 1.386 | 1.251   |
| <b>40</b>                                                           | 0.886        | 0.565 | 0.726 | 0.726   |
| <b>50</b>                                                           | 0.603        | 0.710 | 0.486 | 0.600   |
| <b>60</b>                                                           | 0.838        | 0.602 | 0.594 | 0.678   |
| <b>70</b>                                                           | 0.854        | 0.624 | 0.488 | 0.655   |
| <b>80</b>                                                           | 0.582        | 0.427 | 0.757 | 0.589   |
| <b>90</b>                                                           | 0.537        | 0.628 | 0.605 | 0.590   |
| <b>100</b>                                                          | 1.204        | 1.070 | 0.928 | 1.067   |

Table S21 - AM1-DFT B → β endo and exo dTL train MAEs across three random states (21,22,23) with averaged MAEs. Metrics provided for different percentages of dTL training data.

## 9. Dataset Plots

Plots displaying SQM vs. DFT barriers with the chemical accuracy threshold displayed (grey zones). Plots show spread of both training and test sets for the ML models along with pre-ML MAE and  $R^2$  (Fig. S10 – S13).

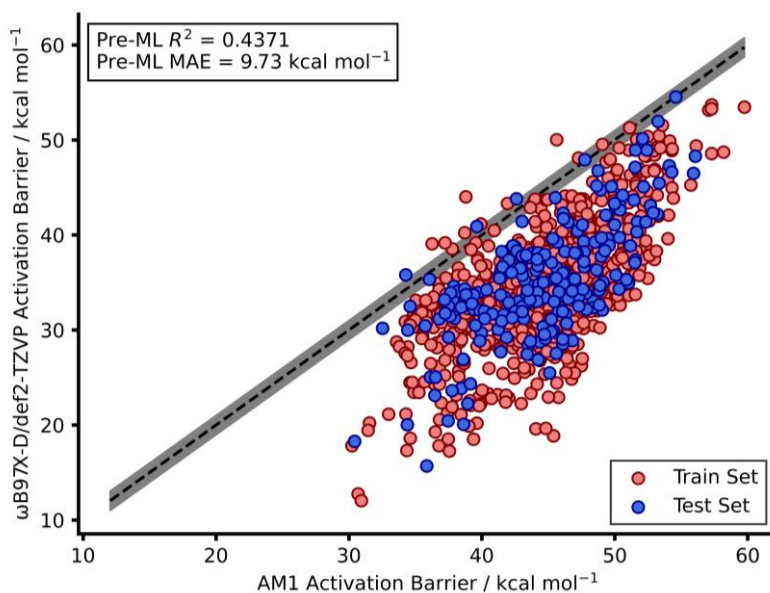

Fig. S10 - AM1 vs DFT endo activation barrier plot with pre-ML  $R^2$  and MAE.

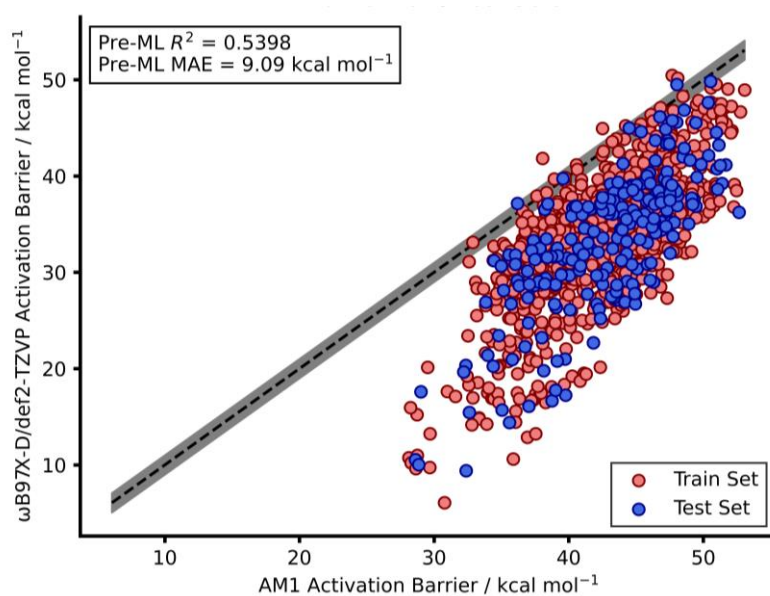

Fig. S11 - AM1 vs DFT exo activation barrier plot with pre-ML  $R^2$  and MAE.

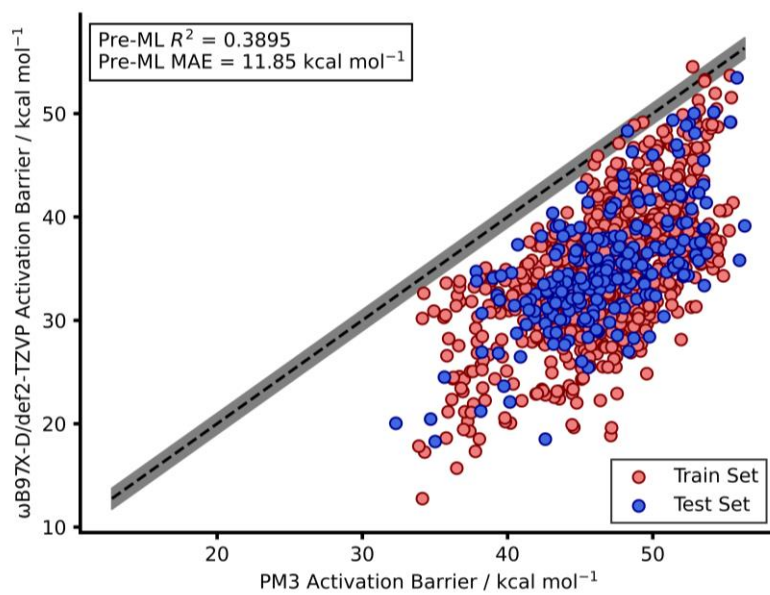

Fig. S12 – PM3 vs DFT endo activation barrier plot with pre-ML  $R^2$  and MAE.

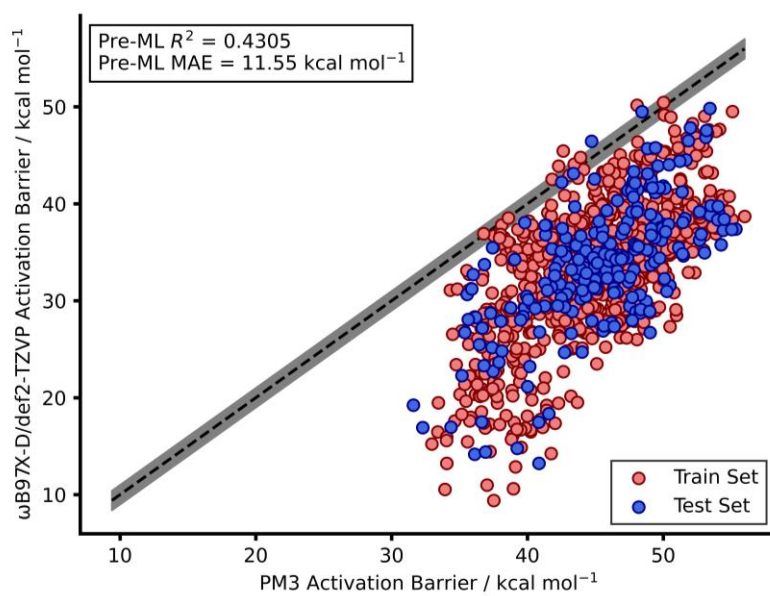

Fig. S13 – PM3 vs DFT exo activation barrier plot with pre-ML  $R^2$  and MAE.

## 10. Learning Curves

The learning curves for the standard ML approaches on both the endo and exo datasets are provided in Fig. S14-25. In each case, the train and test MAEs match well suggesting that no significant overfitting has occurred. All curves are for AM1 models.

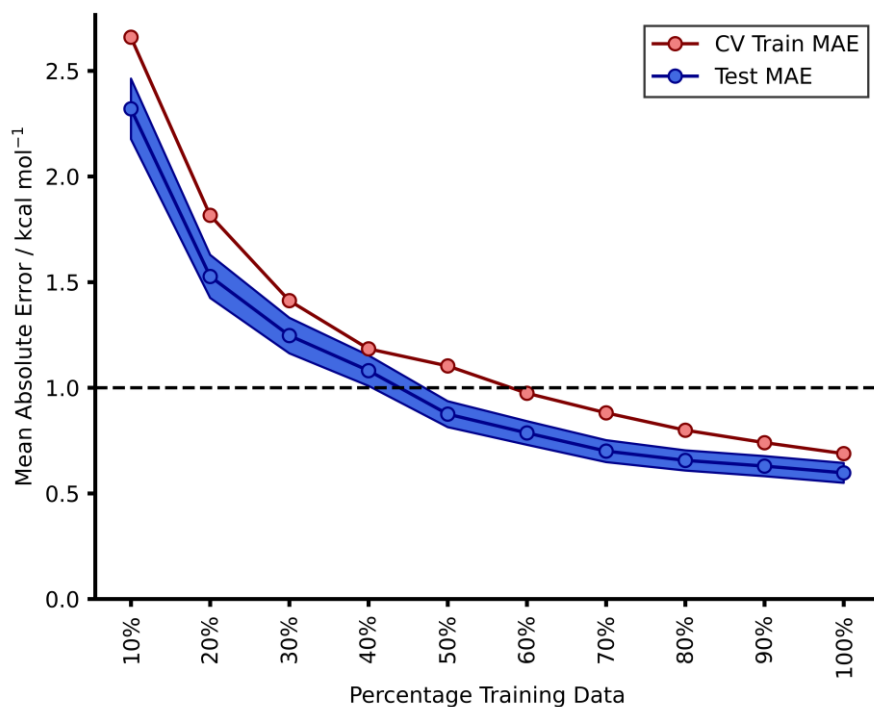

Fig. S14 - AM1-DFT endo KRR (Laplacian) learning curve.

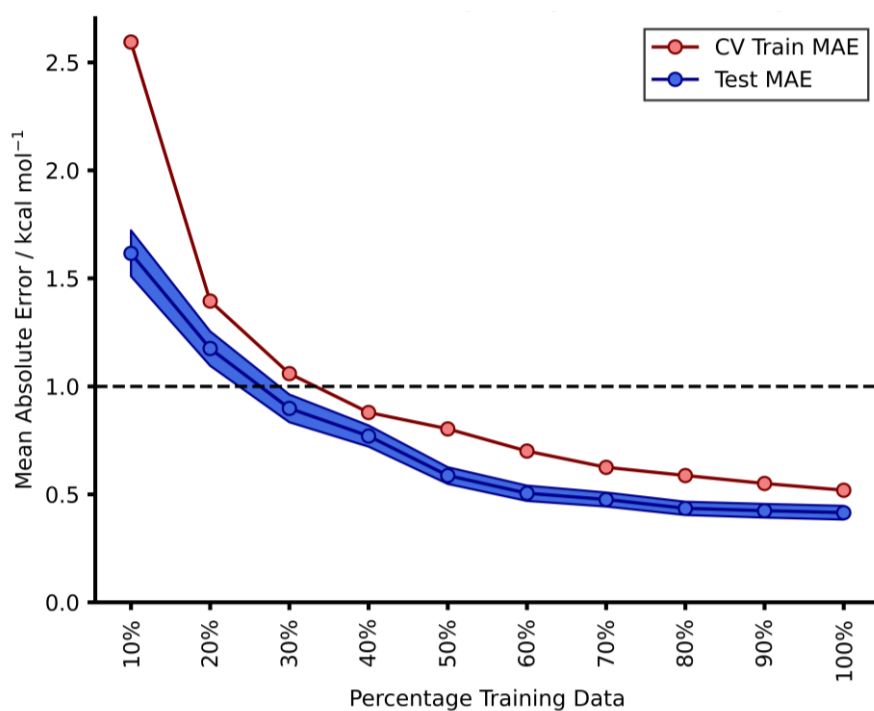

Fig. S15 - AM1-DFT endo KRR (Polynomial) learning curve.



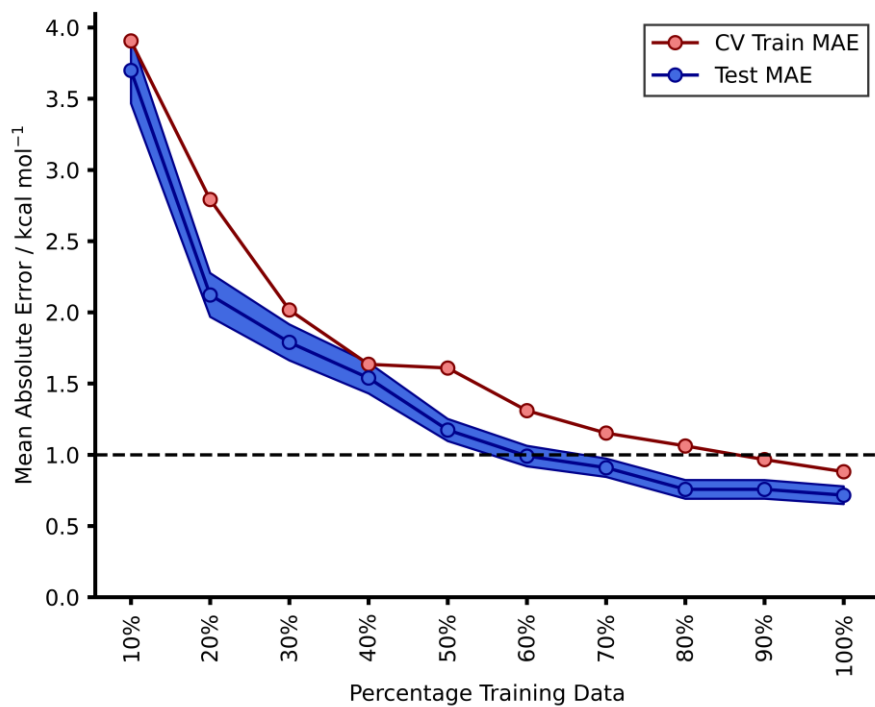

Fig. S16 - AM1-DFT endo KRR (RBF) learning curve.

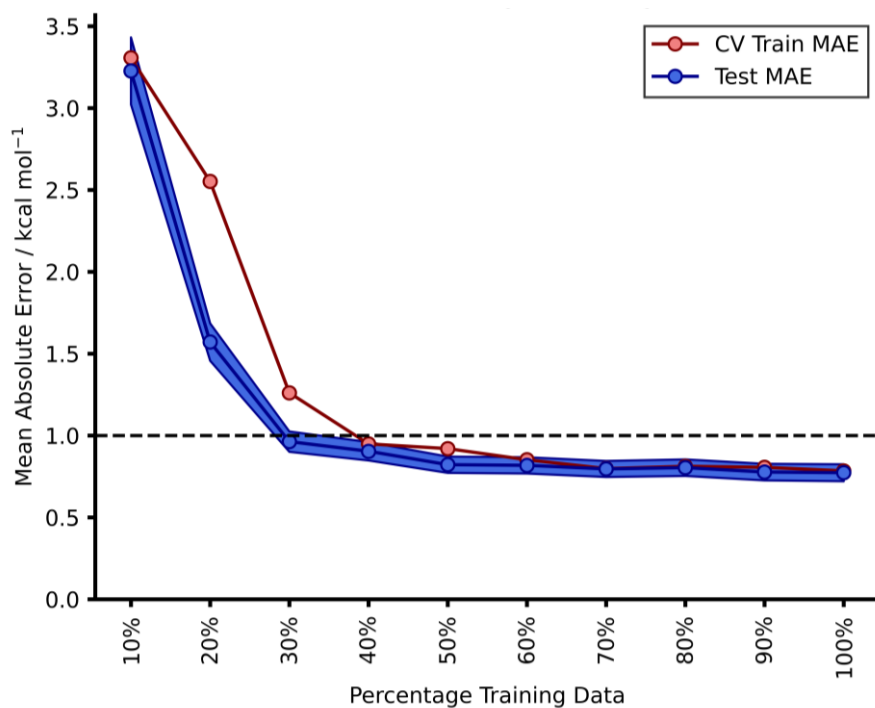

Fig. S17 - AM1-DFT endo Ridge Regression learning curve.

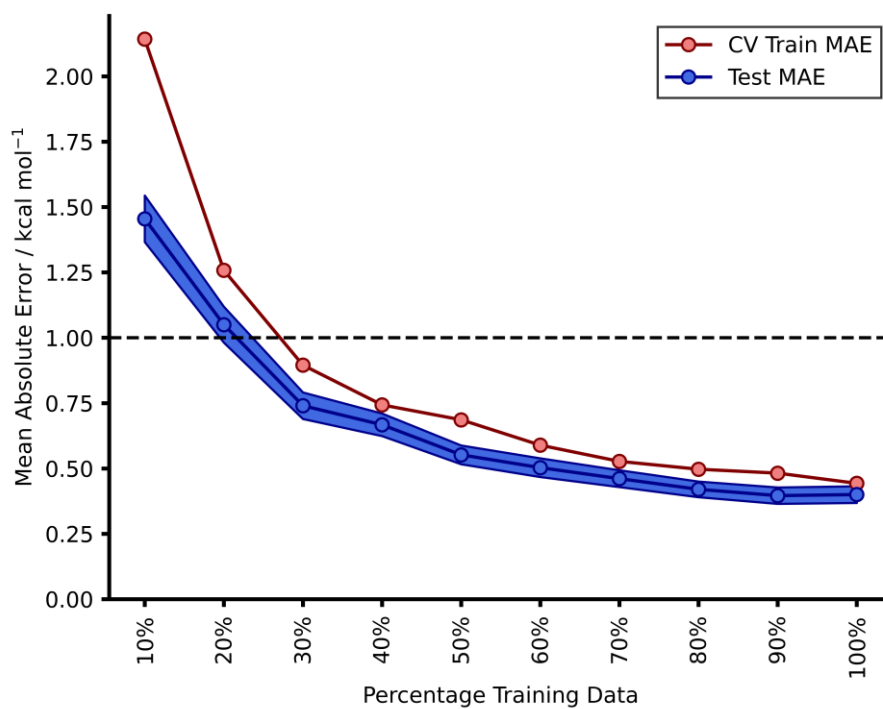

Fig. S18 - AM1-DFT endo SVR (Polynomial) learning curve.

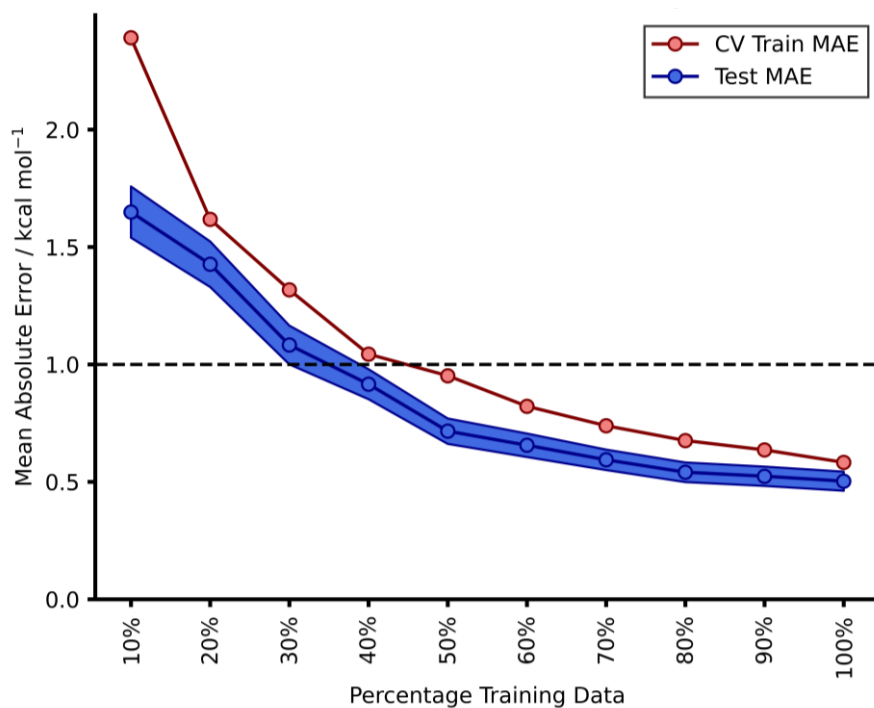

Fig. S19 - AM1-DFT endo SVR (RBF) learning curve.

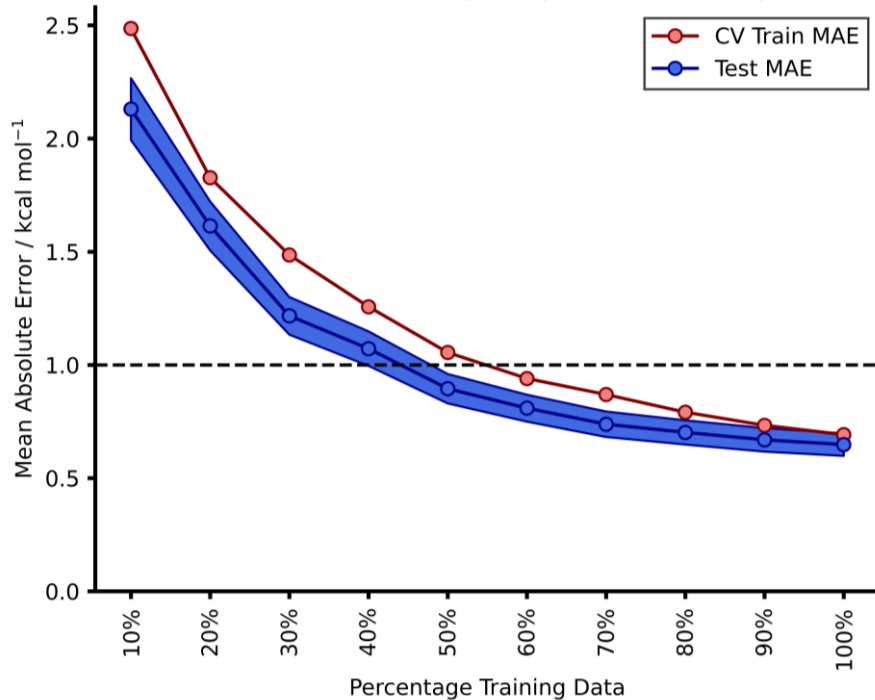

Fig. S20 - AM1-DFT exo KRR (Laplacian) learning curve.

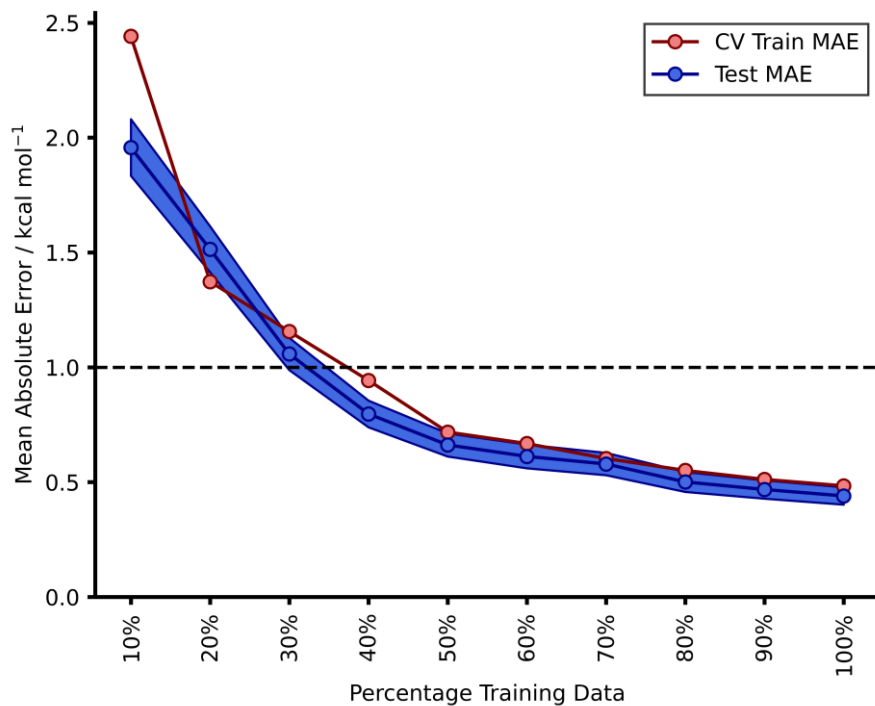

Fig. S21- AM1-DFT exo KRR (Polynomial) learning curve.

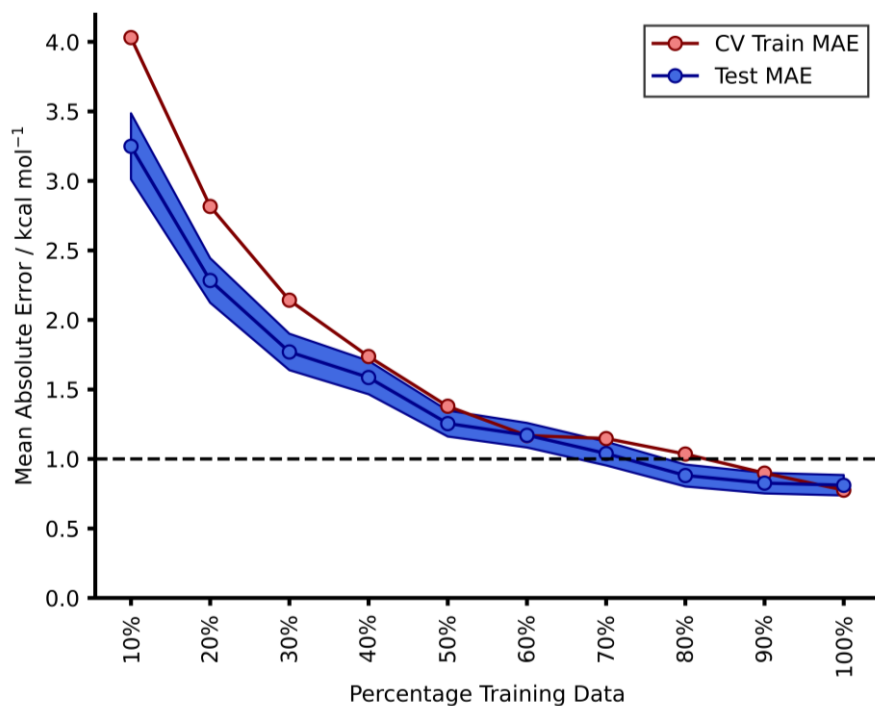

Fig. S22 - AM1-DFT exo KRR (RBF) learning curve.

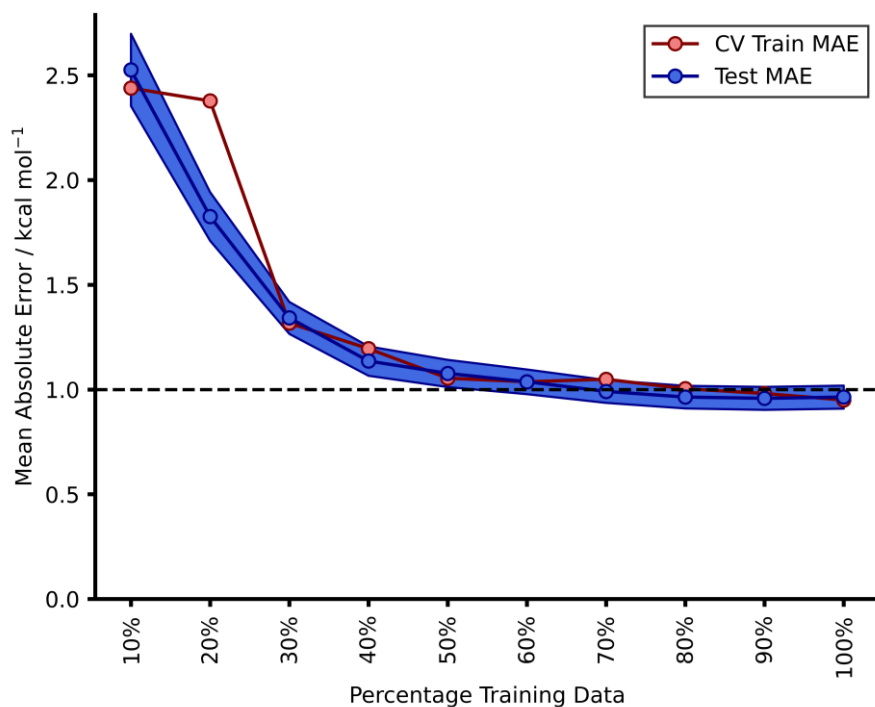

Fig. S23 - AM1-DFT exo Ridge Regression learning curve.

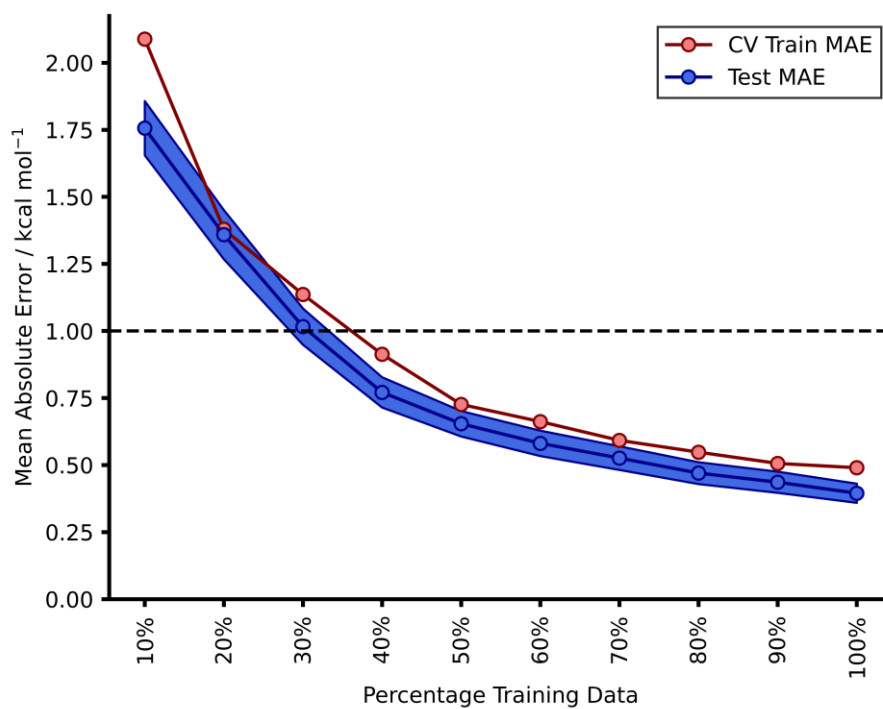

Fig. S24 - AM1-DFT exo SVR (Polynomial) learning curve.

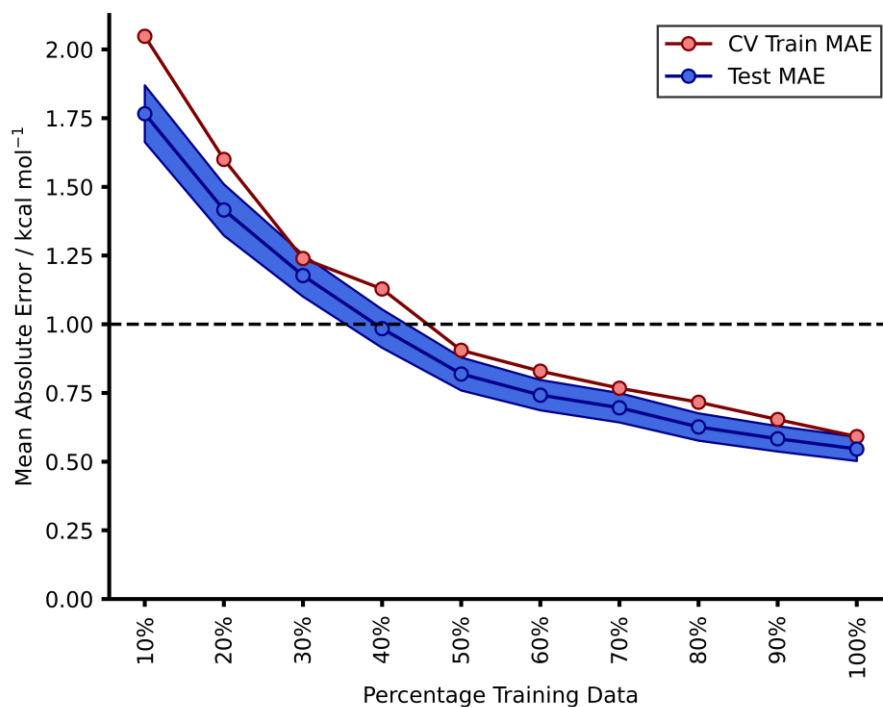

Fig. S25 - AM1-DFT exo SVR (RBF) learning curve.

The learning curves for both hTL and dTL were calculated by taking percentage splits of the target domain training set and performing the hTL/dTL with these splits. The metrics were obtained across three different random states and mean values taken and plotted. These curves look at the lower limits of training data required for obtaining chemically accurate free energy barrier target test set predictions on a different reaction class at the same or at a higher level of theory (LoT) relative to the base model. All curves are for AM1 data. Figures S26-S29 are for hTL and Figures S30 and S31 are for dTL.

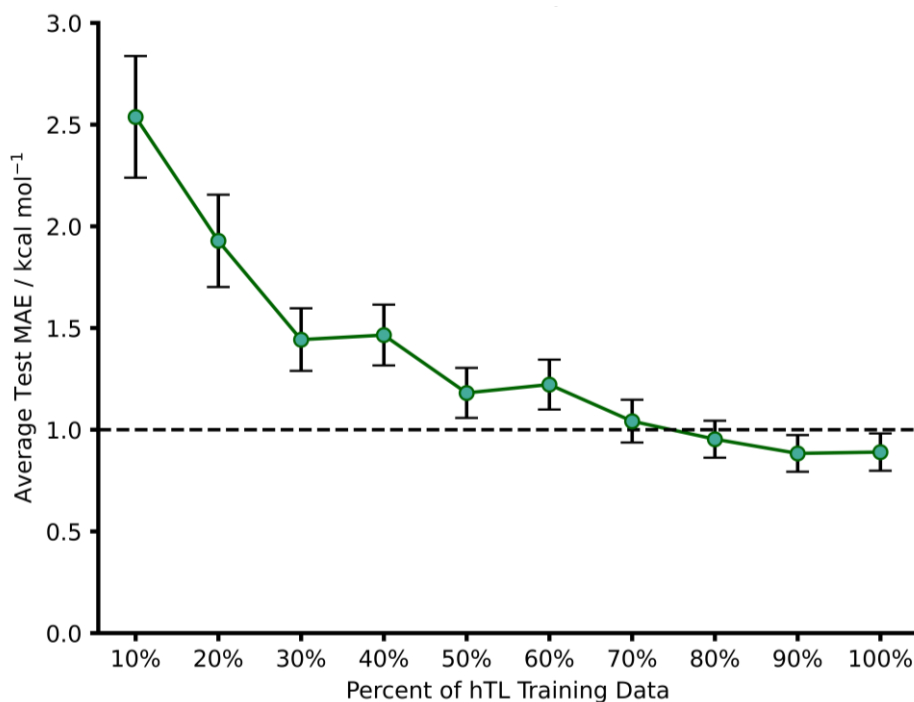

Fig. S26 - AM1-DFT endo A  $\rightarrow$   $\alpha$  hTL target test set learning curve.

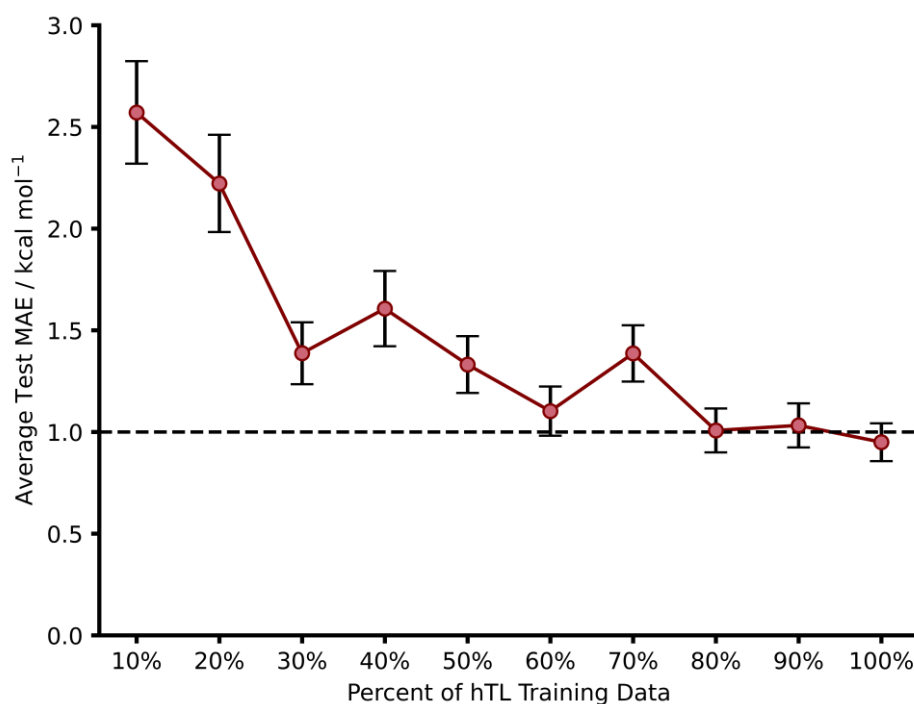

Fig. S27 - AM1-DFT exo A  $\rightarrow$   $\alpha$  hTL target test set learning curve.

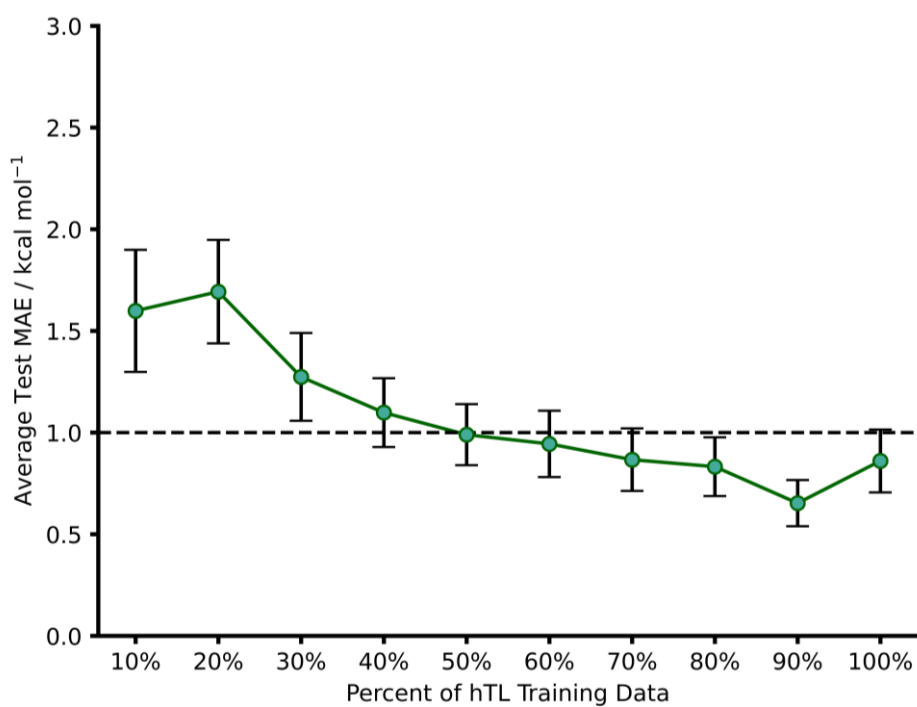

Fig. S28 - AM1-DFT endo  $B \rightarrow \beta$ hTL target test set learning curve.

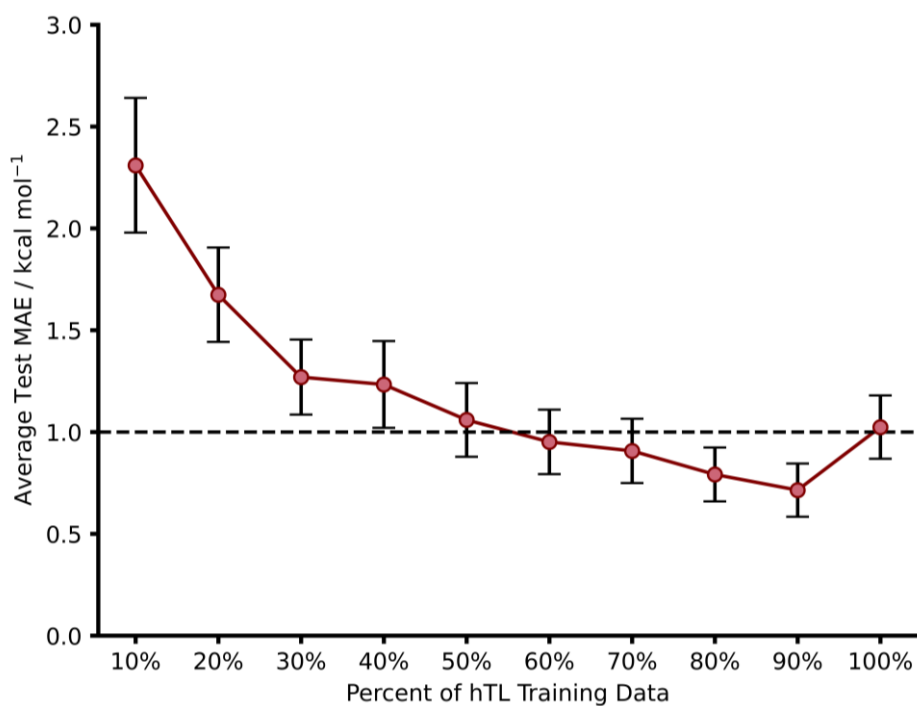

Fig. S29 - AM1-DFT exo  $B \rightarrow \beta$ hTL target test set learning curve.

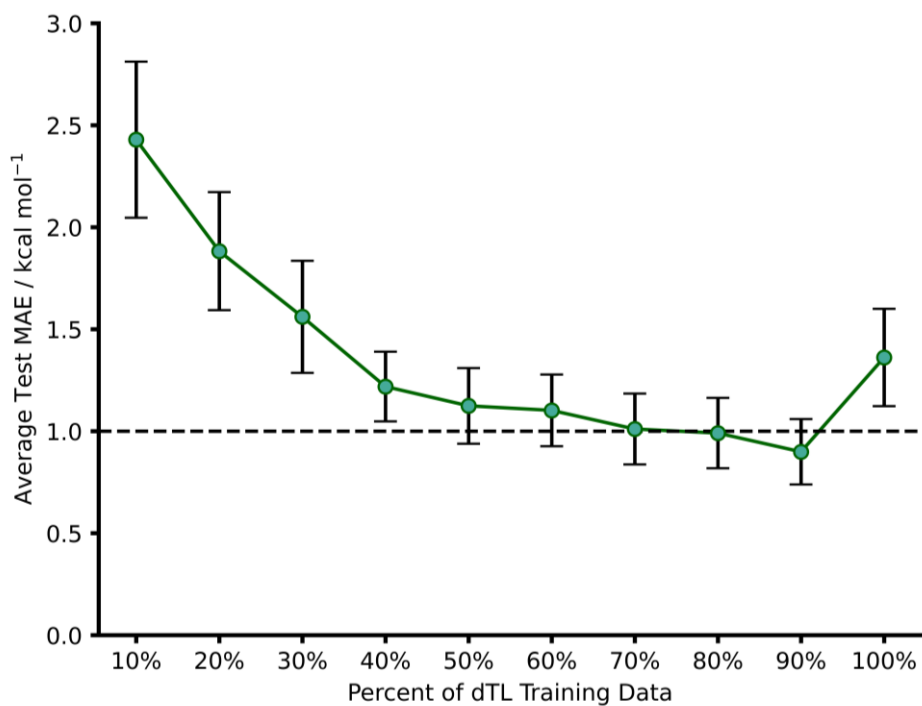

Fig. S30 - AM1-higher LoT DFT endo B  $\rightarrow$   $\beta$  dTL target test set learning curve.

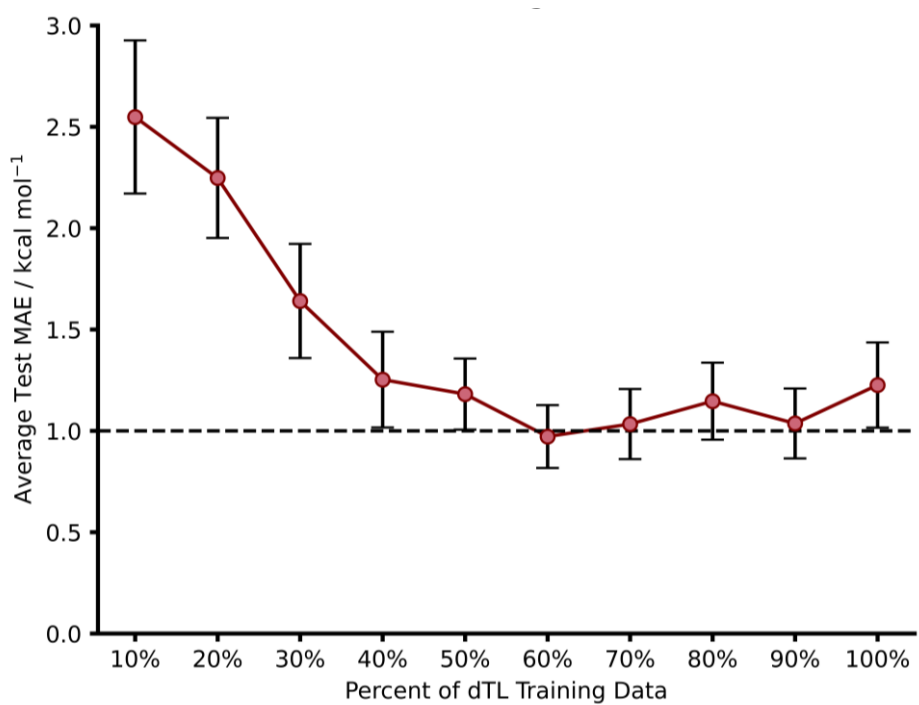

Fig. S31 - AM1-higher LoT DFT exo B  $\rightarrow$   $\beta$  dTL target test set learning curve.



## 11. Transition State Structural Analysis

Root-mean-squared deviations of atomic positions (RMSDs) were calculated for both AM1 and PM3 transition state (TS) structures against their respective DFT TS structures. RMSDs were calculated using a quaternion-based characteristic polynomial method<sup>47</sup> with the spyrmsd Python package (Fig. S32 – S34).<sup>48</sup>

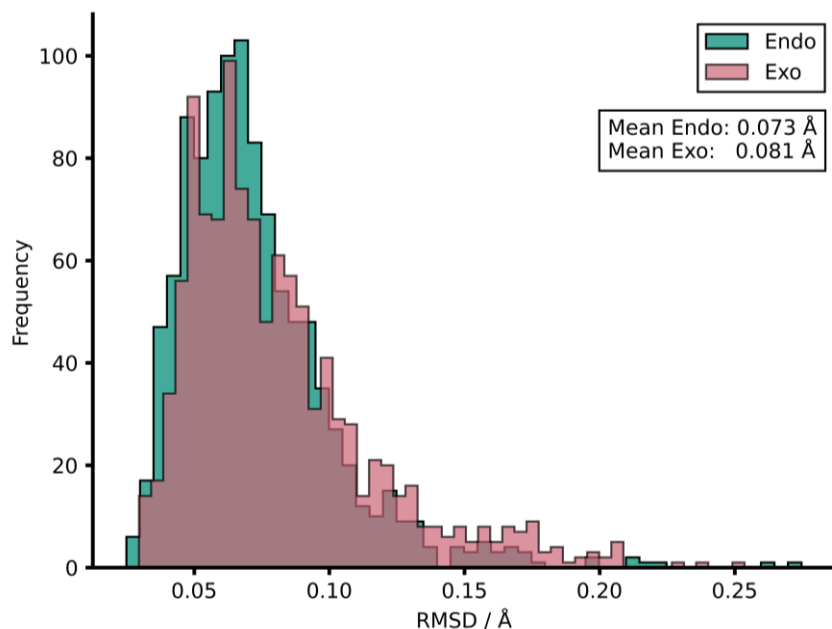

Fig. S32 - AM1-DFT TS RMSDs for both endo and exo structures.

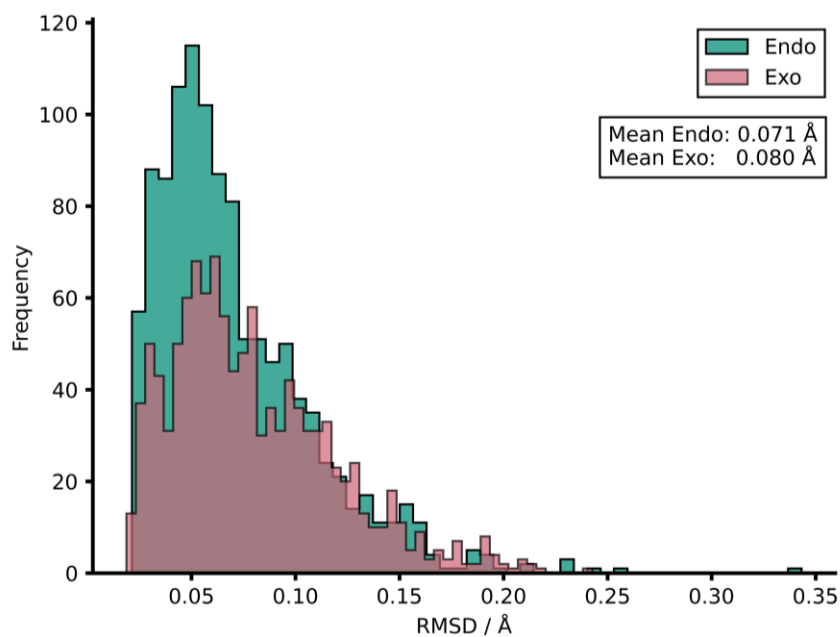

Fig. S33 – PM3-DFT TS RMSDs for both endo and exo structures.

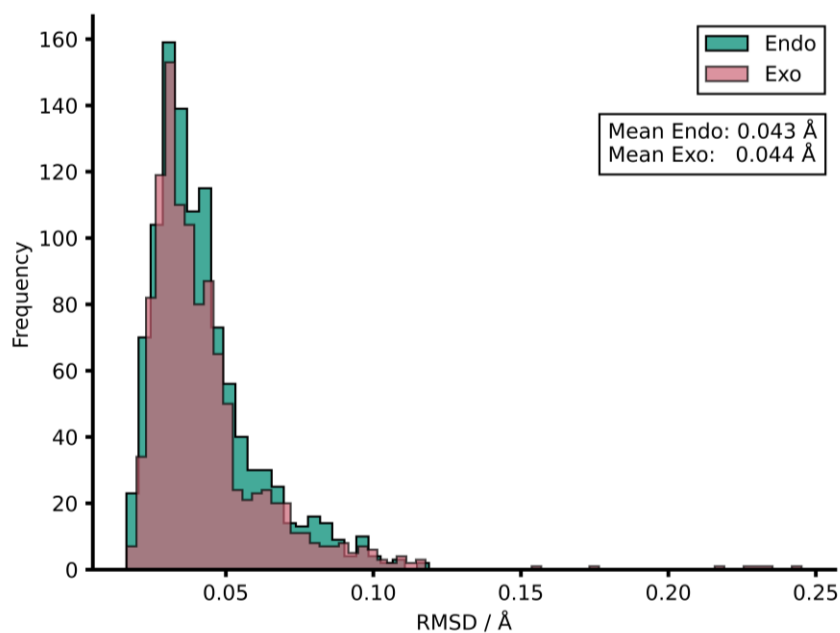

Fig. S34 – PM3-AM1 TS RMSDs for both endo and exo structures.

For TL similarity metric analysis, RDKit was used to generate Morgan fingerprints for each AM1 TS structure in the source and target domain. Tanimoto and Dice similarities were then calculated for every structure in the source domain against every structure in the target domain. Fig. S35 - S38 show  $A \rightarrow \alpha$  and  $B \rightarrow \beta$  Tanimoto and Dice similarity frequencies, respectively, along with corresponding mean values.

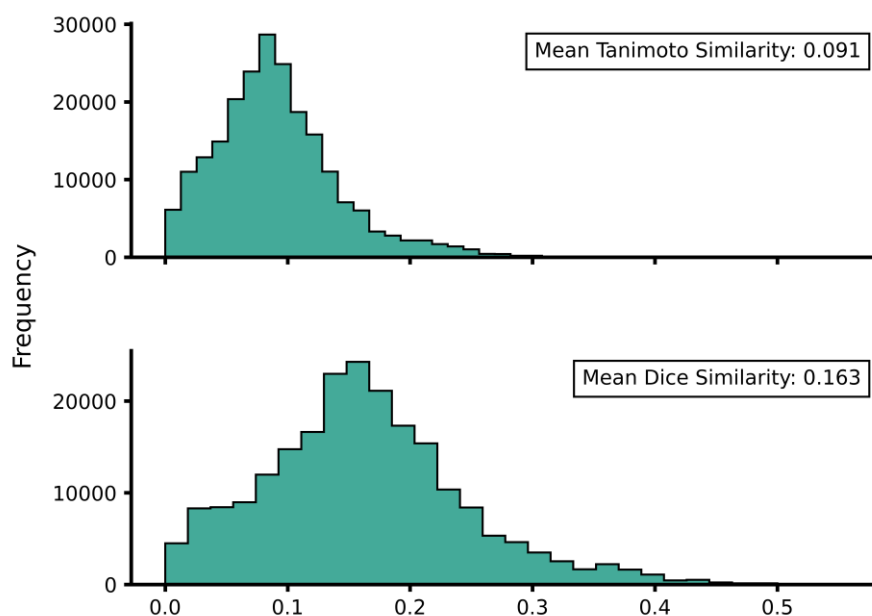

Fig. S35 – Endo AM1  $A \rightarrow \alpha$  source and target domain Tanimoto and Dice similarities obtained from Morgan fingerprints.

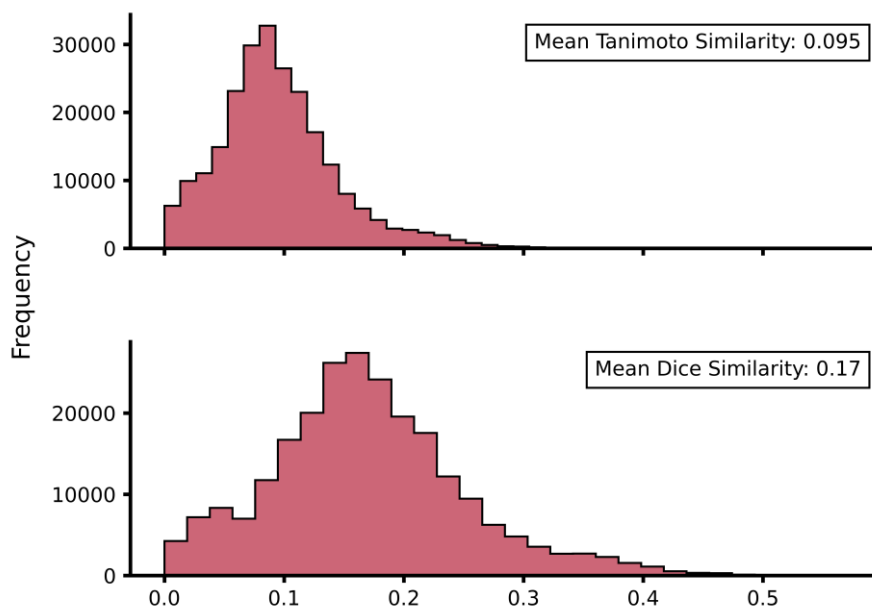

Fig. S36 - Exo AM1 A  $\rightarrow$   $\alpha$  source and target domain Tanimoto and Dice similarities obtained from Morgan fingerprints.

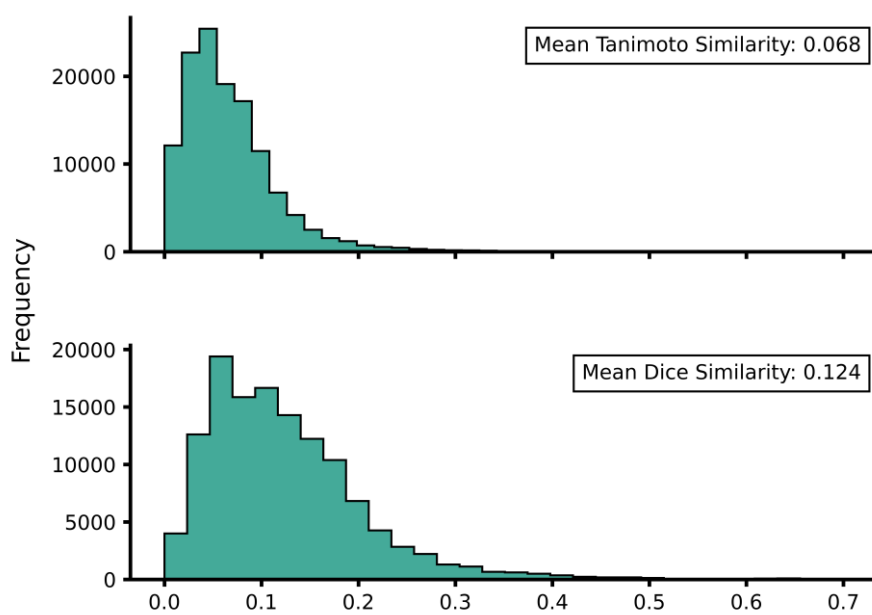

Fig. S37 - Endo AM1 B  $\rightarrow$   $\beta$  source and target domain Tanimoto and Dice similarities obtained from Morgan fingerprints.

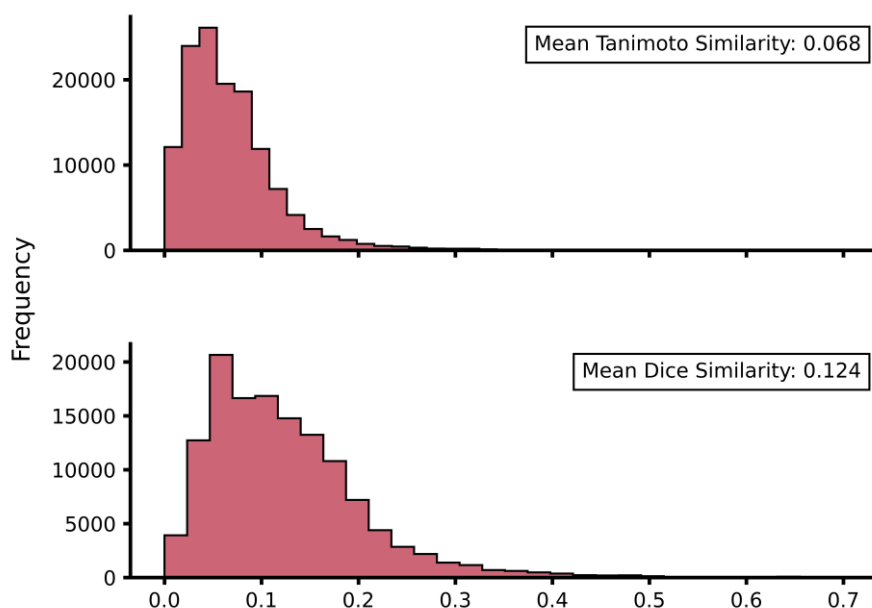

Fig. S38 - Exo AM1 B  $\rightarrow$   $\beta$  source and target domain Tanimoto and Dice similarities obtained from Morgan fingerprints.

A feature vector similarity approach was also performed on the normalised feature vectors. Below is a step by step of how this was performed:

1. Normalise the feature vectors from both the source and target domains.
2. Calculate the mean for each normalised feature vector in both the source and target domains.
3. Calculate the absolute difference between each normalised feature vector mean from the source and the target domain to give a difference value for every feature vector.
4. Calculate the mean value for all normalised feature vector differences to obtain a singular similarity metric between a given source and target domain.

Table S22 shows the results from this. For comparative purposes, the metric was calculated for the case in which the endo dataset is both the source and target domain. This would yield a metric of 0 as the values are identical thus, values closer to 0 should indicate higher similarity between a given source and target domain.

| Source and Target Domain | Similarity Metric |
|--------------------------|-------------------|
| Endo - Endo              | 0                 |
| Exo - Exo                | 0                 |
| Endo A - $\alpha$        | 0.0024043         |
| Exo A - $\alpha$         | 0.0024942         |
| Endo B - $\beta$         | 0.0041303         |
| Exo B - $\beta$          | 0.0040968         |
| Endo - [3+2]             | 0.0042639         |
| Exo - [3+2]              | 0.0043456         |

Table S22 – Normalised feature vector similarity metrics for combinations of source and target domain.

## 12. Direct Training

To evaluate overfitting in the extreme low data regimes, the target datasets for hTL and dTL ( $\alpha$  and  $\beta$ ) as well as the [3+2] dataset were used to train NNs directly. Tables S23-S26 show the results from this direct training.

| $\alpha$ Endo Test MAE / kcal mol <sup>-1</sup> Direct Training Train Percentages  |               |               |               |               |
|------------------------------------------------------------------------------------|---------------|---------------|---------------|---------------|
| Percent of Training Data                                                           | Random State  |               |               | Average       |
|                                                                                    | 21            | 22            | 23            |               |
| <b>10</b>                                                                          | 3.122 ± 0.257 | 2.924 ± 0.315 | 3.449 ± 0.323 | 3.165 ± 0.298 |
| <b>20</b>                                                                          | 2.341 ± 0.230 | 1.935 ± 0.207 | 2.613 ± 0.294 | 2.296 ± 0.243 |
| <b>30</b>                                                                          | 1.994 ± 0.219 | 1.849 ± 0.219 | 1.363 ± 0.123 | 1.736 ± 0.187 |
| <b>40</b>                                                                          | 1.608 ± 0.190 | 1.476 ± 0.161 | 1.546 ± 0.142 | 1.544 ± 0.164 |
| <b>50</b>                                                                          | 1.306 ± 0.154 | 1.617 ± 0.172 | 1.349 ± 0.125 | 1.424 ± 0.15  |
| <b>60</b>                                                                          | 1.362 ± 0.159 | 1.566 ± 0.16  | 1.264 ± 0.13  | 1.397 ± 0.149 |
| <b>70</b>                                                                          | 1.208 ± 0.161 | 1.227 ± 0.132 | 1.106 ± 0.089 | 1.18 ± 0.127  |
| <b>80</b>                                                                          | 1.328 ± 0.170 | 1.194 ± 0.129 | 1.032 ± 0.109 | 1.185 ± 0.136 |
| <b>90</b>                                                                          | 1.111 ± 0.149 | 1.121 ± 0.098 | 0.928 ± 0.102 | 1.053 ± 0.117 |
| <b>100</b>                                                                         | 0.994 ± 0.112 | 0.998 ± 0.087 | 0.975 ± 0.08  | 0.989 ± 0.093 |
| $\alpha$ Endo Train MAE / kcal mol <sup>-1</sup> Direct Training Train Percentages |               |               |               |               |
| <b>10</b>                                                                          | 1.001         | 1.273         | 0.907         | 1.06          |
| <b>20</b>                                                                          | 1.045         | 1.315         | 1.242         | 1.2           |
| <b>30</b>                                                                          | 0.852         | 0.958         | 0.684         | 0.831         |
| <b>40</b>                                                                          | 1.004         | 0.914         | 0.814         | 0.911         |
| <b>50</b>                                                                          | 0.503         | 0.700         | 0.710         | 0.638         |
| <b>60</b>                                                                          | 0.802         | 0.705         | 0.868         | 0.791         |
| <b>70</b>                                                                          | 0.558         | 0.479         | 0.566         | 0.534         |
| <b>80</b>                                                                          | 0.791         | 0.569         | 0.770         | 0.71          |
| <b>90</b>                                                                          | 0.683         | 0.537         | 0.647         | 0.622         |
| <b>100</b>                                                                         | 0.609         | 0.484         | 0.503         | 0.532         |

Table S23 - AM1-DFT  $\alpha$  endo direct training test and train MAEs across three random states (21,22,23) with averaged MAEs. Metrics provided for different percentages of direct training data.

| $\alpha$ Exo Test MAE / kcal mol <sup>-1</sup> Direct Training Train Percentages  |               |               |               |               |
|-----------------------------------------------------------------------------------|---------------|---------------|---------------|---------------|
| Percent of Training Data                                                          | Random State  |               |               | Average       |
|                                                                                   | 21            | 22            | 23            |               |
| <b>10</b>                                                                         | 4.643 ± 0.417 | 4.607 ± 0.417 | 2.328 ± 0.206 | 3.859 ± 0.347 |
| <b>20</b>                                                                         | 1.856 ± 0.176 | 2.953 ± 0.386 | 2.948 ± 0.318 | 2.585 ± 0.293 |
| <b>30</b>                                                                         | 1.825 ± 0.172 | 1.314 ± 0.155 | 1.787 ± 0.228 | 1.642 ± 0.185 |
| <b>40</b>                                                                         | 1.483 ± 0.178 | 1.493 ± 0.172 | 1.626 ± 0.197 | 1.534 ± 0.182 |
| <b>50</b>                                                                         | 1.065 ± 0.112 | 1.343 ± 0.148 | 1.286 ± 0.161 | 1.231 ± 0.140 |
| <b>60</b>                                                                         | 0.975 ± 0.118 | 1.040 ± 0.123 | 1.687 ± 0.189 | 1.234 ± 0.143 |
| <b>70</b>                                                                         | 1.602 ± 0.129 | 1.551 ± 0.205 | 2.442 ± 0.242 | 1.865 ± 0.192 |
| <b>80</b>                                                                         | 0.866 ± 0.088 | 1.322 ± 0.141 | 1.207 ± 0.115 | 1.132 ± 0.115 |
| <b>90</b>                                                                         | 1.000 ± 0.093 | 1.240 ± 0.127 | 1.129 ± 0.131 | 1.123 ± 0.117 |
| <b>100</b>                                                                        | 0.846 ± 0.116 | 1.120 ± 0.126 | 1.100 ± 0.111 | 1.022 ± 0.118 |
| $\alpha$ Exo Train MAE / kcal mol <sup>-1</sup> Direct Training Train Percentages |               |               |               |               |
| <b>10</b>                                                                         | 1.753         | 1.577         | 1.877         | 1.736         |
| <b>20</b>                                                                         | 1.327         | 0.925         | 1.691         | 1.314         |
| <b>30</b>                                                                         | 0.881         | 0.511         | 0.848         | 0.747         |
| <b>40</b>                                                                         | 0.787         | 0.604         | 0.747         | 0.713         |
| <b>50</b>                                                                         | 0.613         | 0.626         | 0.588         | 0.609         |
| <b>60</b>                                                                         | 0.520         | 0.524         | 1.384         | 0.809         |
| <b>70</b>                                                                         | 1.204         | 1.169         | 2.082         | 1.485         |
| <b>80</b>                                                                         | 0.536         | 0.632         | 0.717         | 0.628         |
| <b>90</b>                                                                         | 0.721         | 0.810         | 0.639         | 0.724         |
| <b>100</b>                                                                        | 0.407         | 0.722         | 0.668         | 0.599         |

Table S24 - AM1-DFT  $\alpha$  exo direct training test and train MAEs across three random states (21,22,23) with averaged MAEs. Metrics provided for different percentages of direct training data.

| $\beta$ Test MAE / kcal mol <sup>-1</sup> Direct Training Train Percentages  |               |               |               |               |
|------------------------------------------------------------------------------|---------------|---------------|---------------|---------------|
| Percent of Training Data                                                     | Random State  |               |               | Average       |
|                                                                              | 21            | 22            | 23            |               |
| <b>10</b>                                                                    | 2.054 ± 0.410 | 1.958 ± 0.177 | 1.629 ± 0.321 | 1.880 ± 0.303 |
| <b>20</b>                                                                    | 1.318 ± 0.268 | 1.997 ± 0.249 | 1.343 ± 0.324 | 1.553 ± 0.280 |
| <b>30</b>                                                                    | 1.080 ± 0.184 | 0.896 ± 0.141 | 1.476 ± 0.242 | 1.151 ± 0.189 |
| <b>40</b>                                                                    | 1.049 ± 0.160 | 1.003 ± 0.180 | 1.315 ± 0.172 | 1.122 ± 0.171 |
| <b>50</b>                                                                    | 1.032 ± 0.187 | 0.686 ± 0.123 | 0.959 ± 0.158 | 0.892 ± 0.156 |
| <b>60</b>                                                                    | 1.003 ± 0.206 | 0.628 ± 0.120 | 0.453 ± 0.079 | 0.694 ± 0.135 |
| <b>70</b>                                                                    | 1.108 ± 0.203 | 0.659 ± 0.131 | 0.612 ± 0.106 | 0.793 ± 0.147 |
| <b>80</b>                                                                    | 1.035 ± 0.184 | 0.404 ± 0.088 | 0.503 ± 0.076 | 0.647 ± 0.116 |
| <b>90</b>                                                                    | 0.927 ± 0.142 | 0.529 ± 0.095 | 0.475 ± 0.082 | 0.644 ± 0.107 |
| <b>100</b>                                                                   | 0.857 ± 0.139 | 0.533 ± 0.098 | 0.496 ± 0.076 | 0.629 ± 0.104 |
| $\beta$ Train MAE / kcal mol <sup>-1</sup> Direct Training Train Percentages |               |               |               |               |
| <b>10</b>                                                                    | 1.161         | 1.038         | 0.425         | 0.875         |
| <b>20</b>                                                                    | 0.483         | 1.356         | 0.394         | 0.744         |
| <b>30</b>                                                                    | 0.326         | 0.375         | 0.579         | 0.427         |
| <b>40</b>                                                                    | 0.368         | 0.392         | 0.387         | 0.382         |
| <b>50</b>                                                                    | 0.393         | 0.342         | 0.388         | 0.374         |
| <b>60</b>                                                                    | 0.349         | 0.387         | 0.408         | 0.381         |
| <b>70</b>                                                                    | 0.351         | 0.501         | 0.466         | 0.44          |
| <b>80</b>                                                                    | 0.412         | 0.368         | 0.409         | 0.396         |
| <b>90</b>                                                                    | 0.445         | 0.445         | 0.366         | 0.419         |
| <b>100</b>                                                                   | 0.517         | 0.509         | 0.513         | 0.513         |

Table S25 - AM1-DFT  $\beta$  direct training test and train MAEs across three random states (21,22,23) with averaged MAEs. Metrics provided for different percentages of direct training data.

| [3+2] Test MAE / kcal mol <sup>-1</sup> Direct Training Train Percentages  |               |               |               |               |
|----------------------------------------------------------------------------|---------------|---------------|---------------|---------------|
| Percent of Training Data                                                   | Random State  |               |               | Average       |
|                                                                            | 21            | 22            | 23            |               |
| <b>10</b>                                                                  | 2.116 ± 0.182 | 2.116 ± 0.189 | 2.716 ± 0.203 | 2.316 ± 0.191 |
| <b>20</b>                                                                  | 2.108 ± 0.178 | 1.377 ± 0.119 | 1.373 ± 0.114 | 1.619 ± 0.137 |
| <b>30</b>                                                                  | 1.660 ± 0.157 | 1.284 ± 0.127 | 1.176 ± 0.099 | 1.373 ± 0.128 |
| <b>40</b>                                                                  | 1.273 ± 0.149 | 1.014 ± 0.101 | 1.118 ± 0.086 | 1.135 ± 0.112 |
| <b>50</b>                                                                  | 1.310 ± 0.138 | 1.052 ± 0.094 | 1.088 ± 0.079 | 1.150 ± 0.104 |
| <b>60</b>                                                                  | 0.947 ± 0.124 | 0.718 ± 0.081 | 0.886 ± 0.096 | 0.851 ± 0.100 |
| <b>70</b>                                                                  | 0.880 ± 0.098 | 0.850 ± 0.087 | 0.689 ± 0.072 | 0.806 ± 0.085 |
| <b>80</b>                                                                  | 0.812 ± 0.090 | 0.559 ± 0.061 | 0.783 ± 0.077 | 0.718 ± 0.076 |
| <b>90</b>                                                                  | 0.789 ± 0.077 | 0.632 ± 0.068 | 0.620 ± 0.079 | 0.680 ± 0.075 |
| <b>100</b>                                                                 | 0.749 ± 0.080 | 0.626 ± 0.060 | 0.616 ± 0.060 | 0.664 ± 0.067 |
| [3+2] Train MAE / kcal mol <sup>-1</sup> Direct Training Train Percentages |               |               |               |               |
| <b>10</b>                                                                  | 0.966         | 0.417         | 0.775         | 0.720         |
| <b>20</b>                                                                  | 0.737         | 0.645         | 0.520         | 0.634         |
| <b>30</b>                                                                  | 0.430         | 0.757         | 0.575         | 0.587         |
| <b>40</b>                                                                  | 0.488         | 0.720         | 0.738         | 0.649         |
| <b>50</b>                                                                  | 0.665         | 0.785         | 0.614         | 0.688         |
| <b>60</b>                                                                  | 0.434         | 0.438         | 0.495         | 0.456         |
| <b>70</b>                                                                  | 0.442         | 0.613         | 0.413         | 0.489         |
| <b>80</b>                                                                  | 0.502         | 0.359         | 0.572         | 0.478         |
| <b>90</b>                                                                  | 0.553         | 0.423         | 0.450         | 0.475         |
| <b>100</b>                                                                 | 0.429         | 0.433         | 0.374         | 0.412         |

Table S26 - AM1-DFT [3+2] direct training test and train MAEs across three random states (21,22,23) with averaged MAEs. Metrics provided for different percentages of direct training data.



## 13. References

- 1 L. M. Harwood, G. Jones, J. Pickard, R. M. Thomas and D. Watkin, *Tetrahedron Lett.*, 1988, **29**, 5825–5828.
- 2 L. M. Harwood, S. A. Leeming, N. S. Isaacs, G. Jones, J. Pickard, R. M. Thomas and D. Watkin, *Tetrahedron Lett.*, 1988, **29**, 5017–5020.
- 3 R. Gordillo and K. N. Houk, *J. Am. Chem. Soc.*, 2006, **128**, 3543–3553.
- 4 B. J. Levandowski and K. N. Houk, *J. Am. Chem. Soc.*, 2016, **138**, 16731–16736.
- 5 P. Binger, P. Wedemann, R. Goddard and U. H. Brinker, *J. Org. Chem.*, 1996, **61**, 6462–6464.
- 6 L. A. Fisher, N. J. Smith and J. M. Fox, *J. Org. Chem.*, 2013, **78**, 3342–3348.
- 7 F. Liu, R. S. Paton, S. Kim, Y. Liang and K. N. Houk, *J. Am. Chem. Soc.*, 2013, **135**, 15642–15649.
- 8 R. Ukis and C. Schneider, *J. Org. Chem.*, 2019, **84**, 7175–7188.
- 9 V. Eschenbrenner-Lux, K. Kumar and H. Waldmann, *Angew. Chem. Int. Ed.*, 2014, **53**, 11146–11157.
- 10 D. v. Osipov, V. A. Osyanin, G. D. Khaysanova, E. R. Masterova, P. E. Krasnikov and Y. N. Klimochkin, *J. Org. Chem.*, 2018, **83**, 4775–4785.
- 11 S. N. Pieniazek and K. N. Houk, *Angew. Chem. Int. Ed.*, 2006, **45**, 1442–1445.
- 12 N. K. Devaraj, R. Weissleder and S. A. Hilderbrand, *Bioconjug. Chem.*, 2008, **19**, 2297–2299.
- 13 F. Liu, Y. Liang and K. N. Houk, *J. Am. Chem. Soc.*, 2014, **136**, 11483–11493.
- 14 MacroModel, Schrödinger, *Schrödinger Release 2018-2*, LLC, New York, 2018.
- 15 F. Mohamadi, N. G. J. Richards, W. C. Guida, R. Liskamp, M. Lipton, C. Caufield, G. Chang, T. Hendrickson and W. C. Still, *J. Comput. Chem.*, 1990, **11**, 440–467.
- 16 K. Roos, C. Wu, W. Damm, M. Reboul, J. M. Stevenson, C. Lu, M. K. Dahlgren, S. Mondal, W. Chen, L. Wang, R. Abel, R. A. Friesner and E. D. Harder, *J. Chem. Theory. Comput.*, 2019, **15**, 1863–1874.
- 17 M. J. S. Dewar, E. G. Zoebisch, E. F. Healy and J. J. P. Stewart, *J. Am. Chem. Soc.*, 1985, **107**, 3902–3909.
- 18 J. J. P. Stewart, *J. Comput. Chem.*, 1989, **10**, 221–264.
- 19 J.-D. Chai and M. Head-Gordon, *Phys. Chem. Chem. Phys.*, 2008, **10**, 6615.
- 20 F. Weigend and R. Ahlrichs, *Phys. Chem. Chem. Phys.*, 2005, **7**, 3297–3305.
- 21 M. J. Frisch, G. W. Trucks, H. B. Schlegel, G. E. Scuseria, M. A. Robb, J. R. Cheeseman, G. Scalmani, V. Barone, B. Mennucci, G. A. Petersson, H. Nakatsuji, M. Caricato, X. Li, H. P. Hratchian, A. F. Izmaylov, J. Bloino, J. Zheng, J. L. Sonnenberg, M. Hada, M. Ehara, K. Toyota, R. Fukuda, J. Hasegawa, M. Ishida, T. Nakajima, Y. Honda, O. Kitao, H. Nakai, T. Vreven, J. A. Montgomery, J. E. Peralta, F. Ogliaro, M. Bearpark, J. J. Heyd, E. Brothers, K. N. Kudin, V. N. Staroverov, R. Kobayashi, J. Normand, K. Raghavachari, J. C. A. Rendell, S. Burant, S. Iyengar, J.

- Tomasi, M. Cossi, N. Rega, J. M. Millam, M. Klene, J. E. Knox, J. B. Cross, V. Bakken, C. Adamo, J. Jaramillo, R. Gomperts, R. E. Stratmann, O. Yazyev, A. J. Austin, R. Cammi, C. Pomelli, J. W. Ochterski, R. L. Martin, K. Morokuma, V. G. Zakrzewski, G. A. Voth, P. Salvador, J. J. Dannenberg, S. Dapprich, A. D. Daniels, O. Farkas, J. B. Foresman, J. v. Ortiz, J. Cioslowski and D. J. Fox, *Gaussian 16, Revision A.03*, Gaussian, Inc., Wallingford, CT, 2016.
- 22 M. J. Frisch, G. W. Trucks, H. B. Schlegel, G. E. Scuseria, M. A. Robb, J. R. Cheeseman, G. Scalmani, V. Barone, B. Mennucci, G. A. Petersson, H. Nakatsuji, M. Caricato, X. Li, H. P. Hratchian, A. F. Izmaylov, J. Bloino, J. Zheng, J. L. Sonnenberg, M. Hada, M. Ehara, K. Toyota, R. Fukuda, J. Hasegawa, M. Ishida, T. Nakajima, Y. Honda, O. Kitao, H. Nakai, T. Vreven, J. A. Montgomery, J. E. Peralta, F. Ogliaro, M. Bearpark, J. J. Heyd, E. Brothers, K. N. Kudin, V. N. Staroverov, R. Kobayashi, J. Normand, K. Raghavachari, J. C. A. Rendell, S. Burant, S. Iyengar, J. Tomasi, M. Cossi, N. Rega, J. M. Millam, M. Klene, J. E. Knox, J. B. Cross, V. Bakken, C. Adamo, J. Jaramillo, R. Gomperts, R. E. Stratmann, O. Yazyev, A. J. Austin, R. Cammi, C. Pomelli, J. W. Ochterski, R. L. Martin, K. Morokuma, V. G. Zakrzewski, G. A. Voth, P. Salvador, J. J. Dannenberg, S. Dapprich, A. D. Daniels, O. Farkas, J. B. Foresman, J. v. Ortiz, J. Cioslowski and D. J. Fox, *Gaussian 16, Revision C.01*, Gaussian, Inc., Wallingford, CT, 2016.
- 23 S. Kozuch and J. M. L. Martin, *Phys. Chem. Chem. Phys.*, 2011, **13**, 20104–20107.
- 24 G. Luchini, J. v Alegre-Requena, I. Funes-Ardoiz and R. S. Paton, *F1000Research*, 2020, **9**, 291.
- 25 D. Margetic and R. N. Warrener, *Croat. Chem. Acta*, 2003, **76**, 357–363.
- 26 C. Cativiela, V. Dillet, J. I. García, J. A. Mayoral, M. F. Ruiz-López and L. Salvatella, *J. Mol. Struct. (Theochem)*, 1995, **331**, 37–50.
- 27 B. S. Jursic and Z. Zdravkovski, *Tetrahedron*, 1994, **50**, 10379–10390.
- 28 T. H. Musslimani and H. Mettee, *J. Mol. Struct. (Theochem)*, 2004, **672**, 35–43.
- 29 J. J. P. Stewart, *J. Mol. Model.*, 2007, **13**, 1173–1213.
- 30 J. J. P. Stewart, *J. Mol. Model.*, 2013, **19**, 1–32.
- 31 N. Mardirossian and M. Head-Gordon, *Mol. Phys.*, 2017, **115**, 2315–2372.
- 32 L. Goerigk and S. Grimme, *WIREs Comput. Mol. Sci.*, 2014, **4**, 576–600.
- 33 E. H. E. Farrar and M. N. Grayson, *Chem. Sci.*, 2022, **13**, 7594–7603.
- 34 C. Legault, *CYLVIEW20*, Université de Sherbrooke, 2020.
- 35 N. M. O’Boyle, A. L. Tenderholt and K. M. Langner, *J. Comput. Chem.*, 2008, **29**, 839–845.
- 36 R. M. LoPachin, T. Gavin, A. DeCaprio and D. S. Barber, *Chem. Res. Toxicol.*, 2012, **25**, 239–251.
- 37 S. Mitternacht, S. J. Hubbard and Y. Zhou, *F1000Research*, **5**, 189.
- 38 G. Luchini and R. Paton, *DBSTEP: 1.2-alpha Release*, 2021.
- 39 N. M. O’Boyle, C. Morley and G. R. Hutchison, *Chem. Cent. J.*, 2008, **2**.
- 40 F. Pedregosa, V. Michel, O. Grisel, M. Blondel, P. Prettenhofer, R. Weiss, J. Vanderplas, D. Cournapeau, F. Pedregosa, G. Varoquaux, A. Gramfort, B. Thirion, O. Grisel, V. Dubourg, A. Passos, M. Brucher, M. Perrot and É. Duchesnay, *J. Mach. Learn. Res.*, 2011, **12**, 2825–2830.

- 41 Martín Abadi, Ashish Agarwal, Paul Barham, Eugene Brevdo, Zhifeng Chen, Craig Citro, Greg S. Corrado, Andy Davis, Jeffrey Dean, Matthieu Devin, Sanjay Ghemawat, Ian Goodfellow, Andrew Harp, Geoffrey Irving, Michael Isard, Rafal Jozefowicz, Yangqing Jia, Lukasz Kaiser, Manjunath Kudlur, Josh Levenberg, Dan Mané, Mike Schuster, Rajat Monga, Sherry Moore, Derek Murray, Chris Olah, Jonathon Shlens, Benoit Steiner, Ilya Sutskever, Kunal Talwar, Paul Tucker, Vincent Vanhoucke, Vijay Vasudevan, Fernanda Viégas, Oriol Vinyals, Pete Warden, Martin Wattenberg, Martin Wicke, Yuan Yu and Xiaoqiang Zheng, *TensorFlow: Large-scale machine learning on heterogeneous systems*, 2015.
- 42 L. Li, K. Jamieson, G. DeSalvo, A. Rostamizadeh and A. Talwalkar, *J. Mach. Learn. Res.*, 2018, **18**, 1–52.
- 43 A. E. Hoerl and R. W. Kennard, *Technometrics*, 1970, **12**, 55.
- 44 V. Vovk, *Empirical Inference*, Springer Berlin Heidelberg, 2013.
- 45 C. Cortes, V. Vapnik and L. Saitta, *Mach. Learn.*, 1995, **20**, 273–297.
- 46 T. Stuyver, K. Jorner and C. W. Coley, *Sci. Data.*, 2023, **10**, 1–14.
- 47 D. L. Theobald, *Acta Crystallogr., Sect. A: Found. Crystallogr.*, 2005, **61**, 478–480.
- 48 R. Meli and P. C. Biggin, *J. Cheminform.*, 2020, **12**, 1–7.
